# Supplementary material for: Neural dynamics of grip and goal integration during the processing of others’ actions with objects: An ERP study
Source: PubMed Central journal article supplement (PMC7081278; doi:10.1038/s41598-020-61963-7), 2020-03-19

Please find in the following pages each of the stimuli used in the experiment. For sake of simplicity, in the present document pages will always organized as followed :

**Top left**  
**Grip-typical**  
**Goal-typical**

**Top right**  
**Grip-typical**  
**Goal-atypical**

**Bottom left**  
**Grip-atypical**  
**Goal-typical**

**Bottom right**  
**Grip-atypical**  
**Goal-atypical**

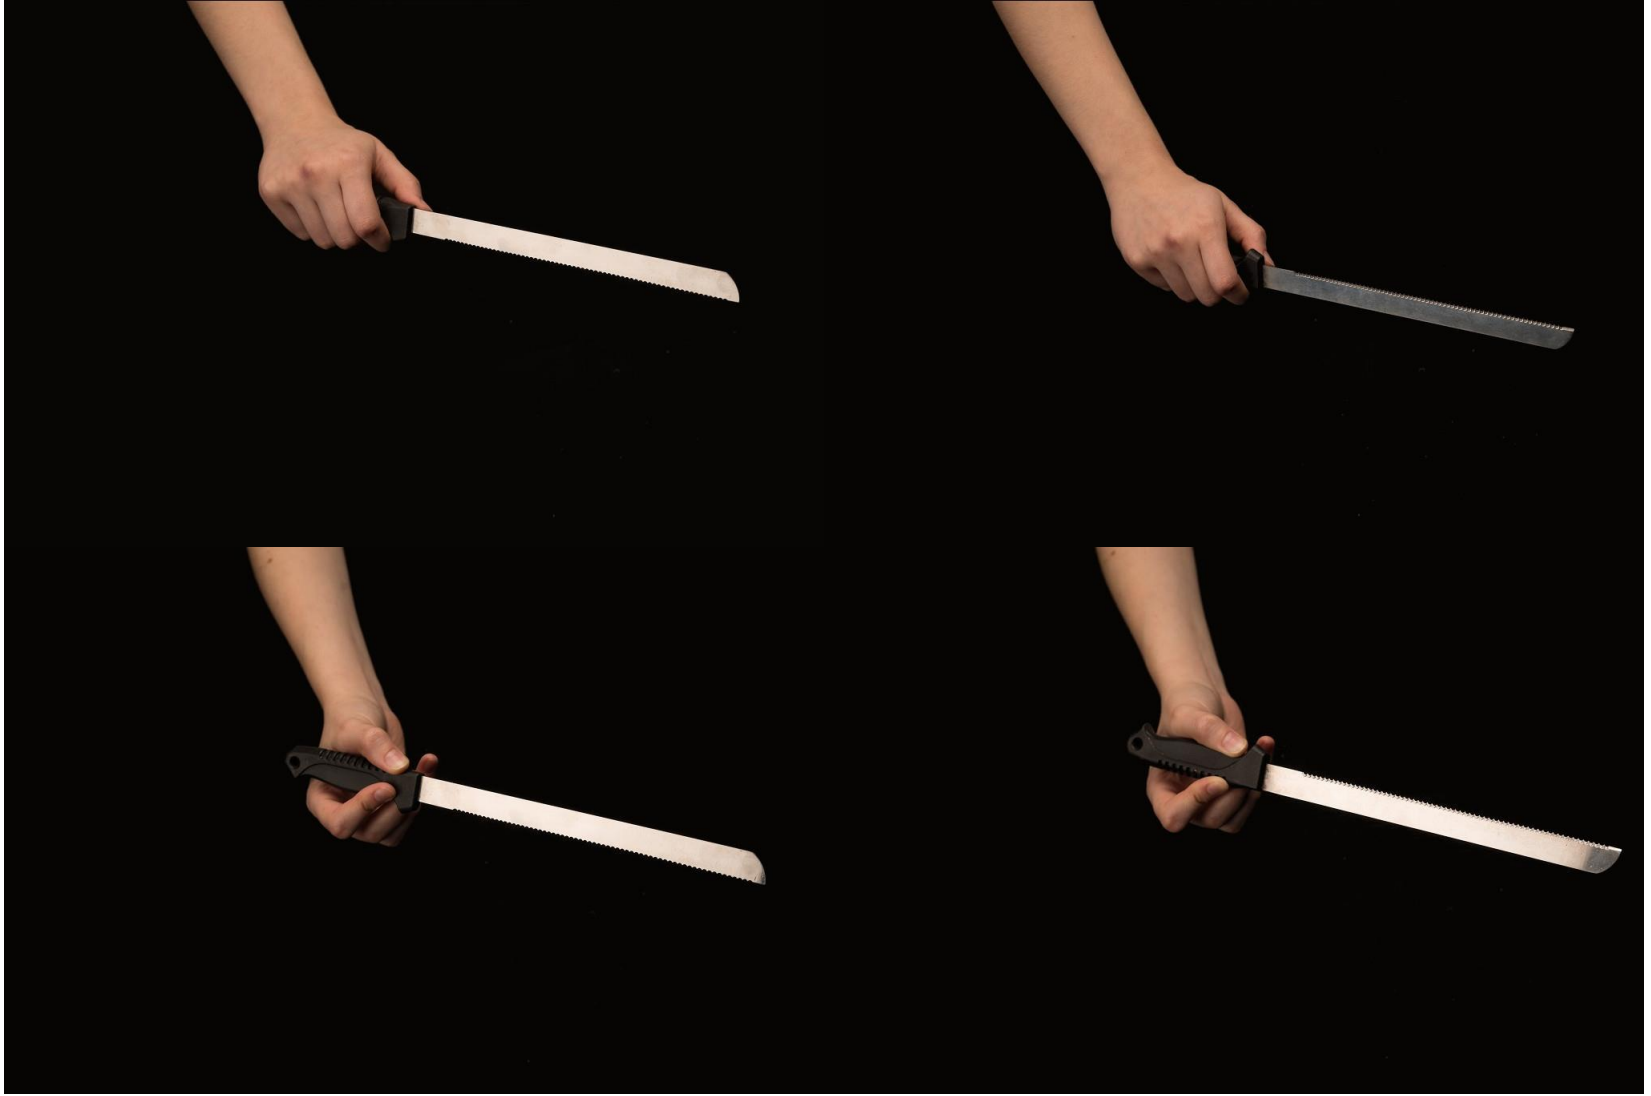

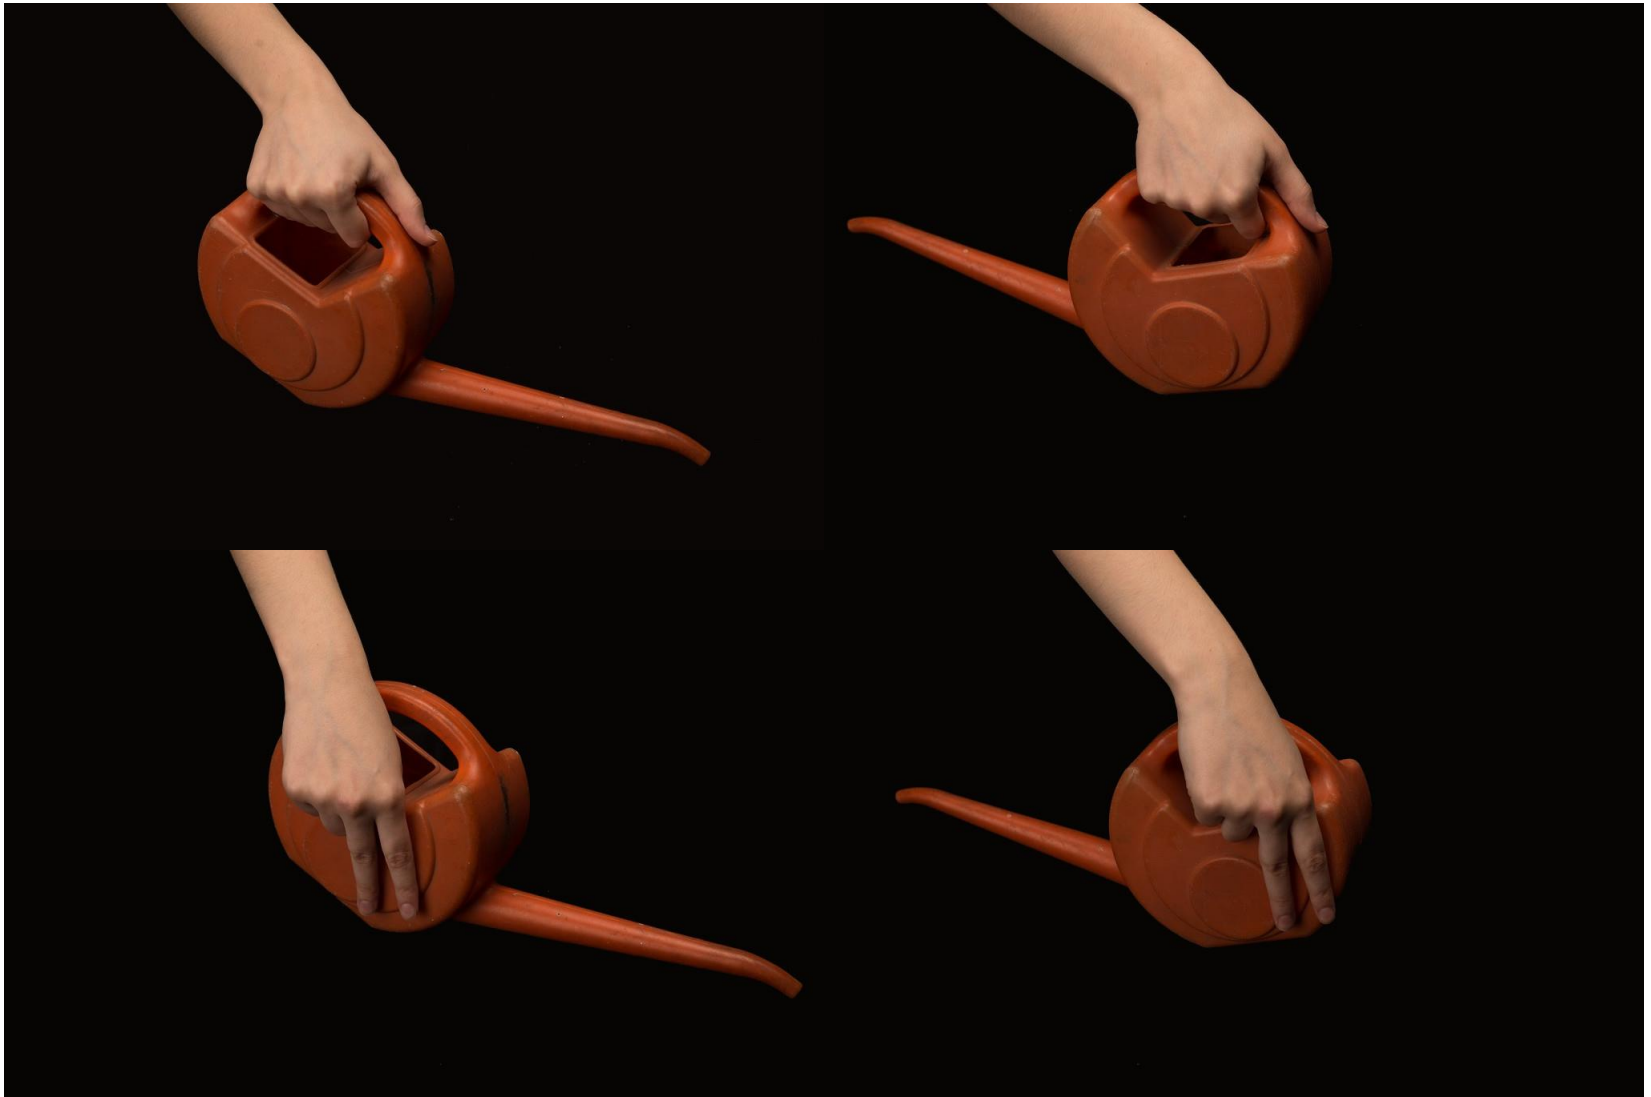

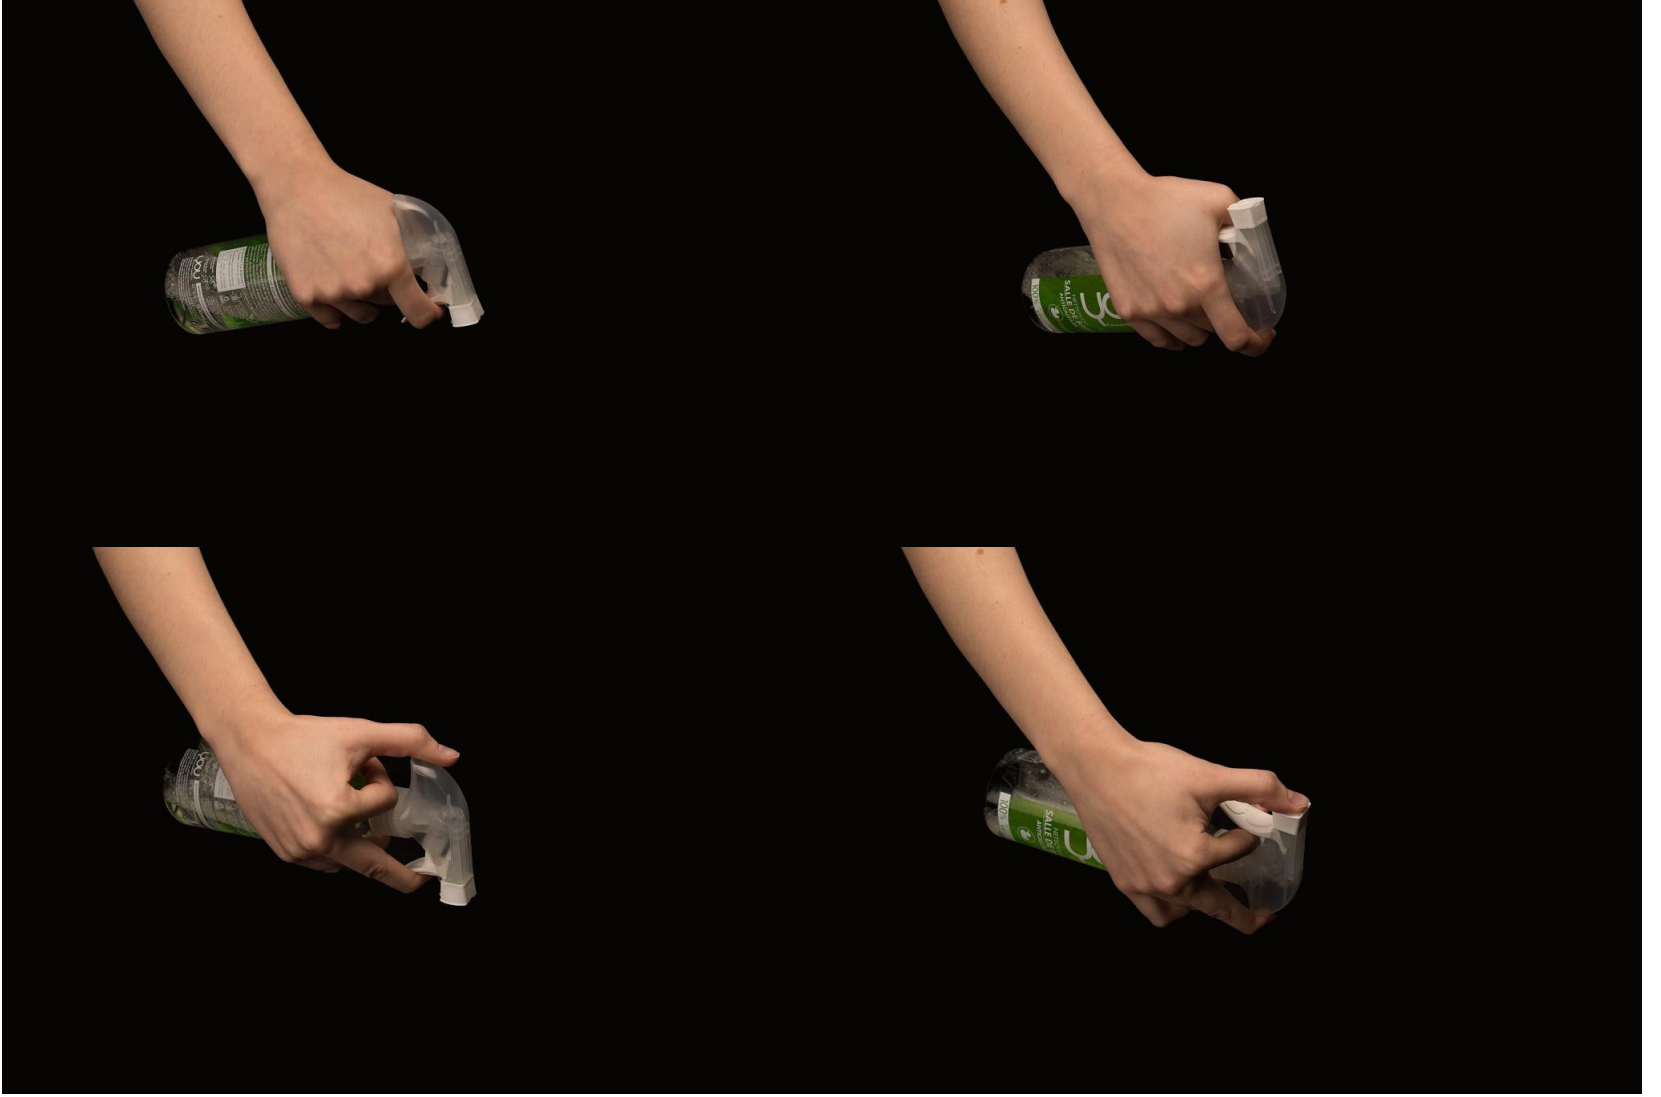

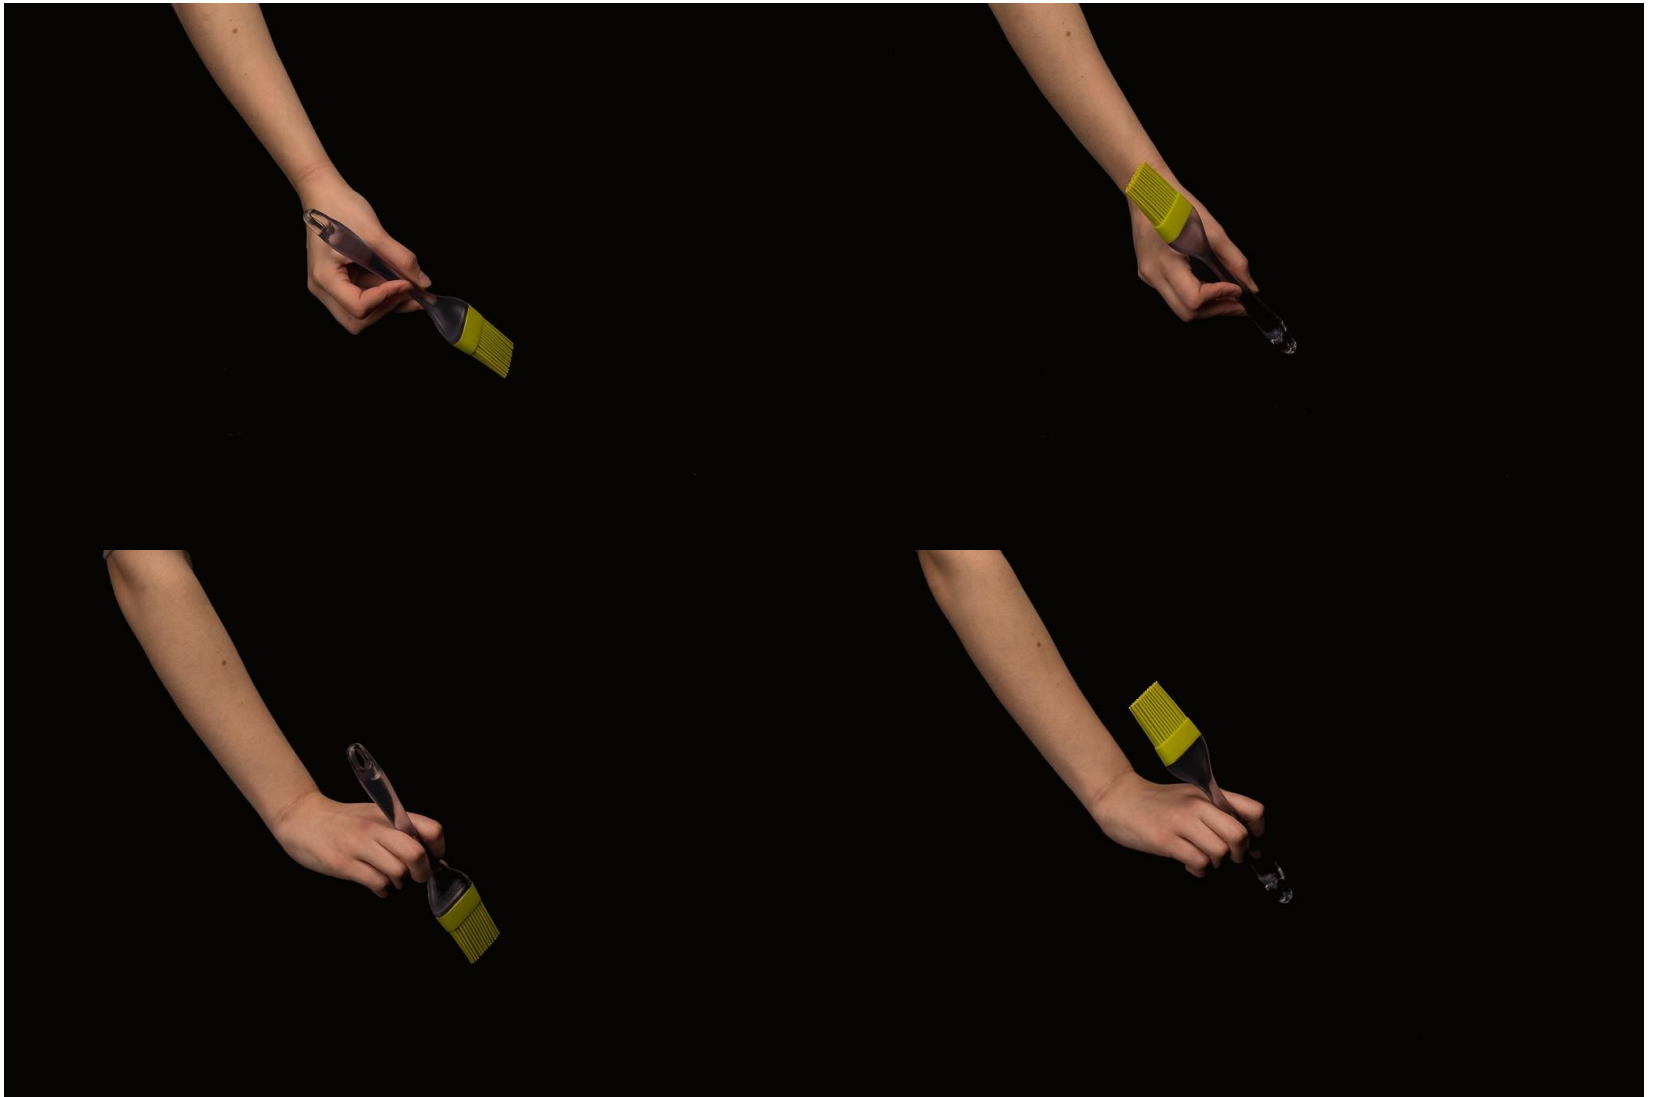

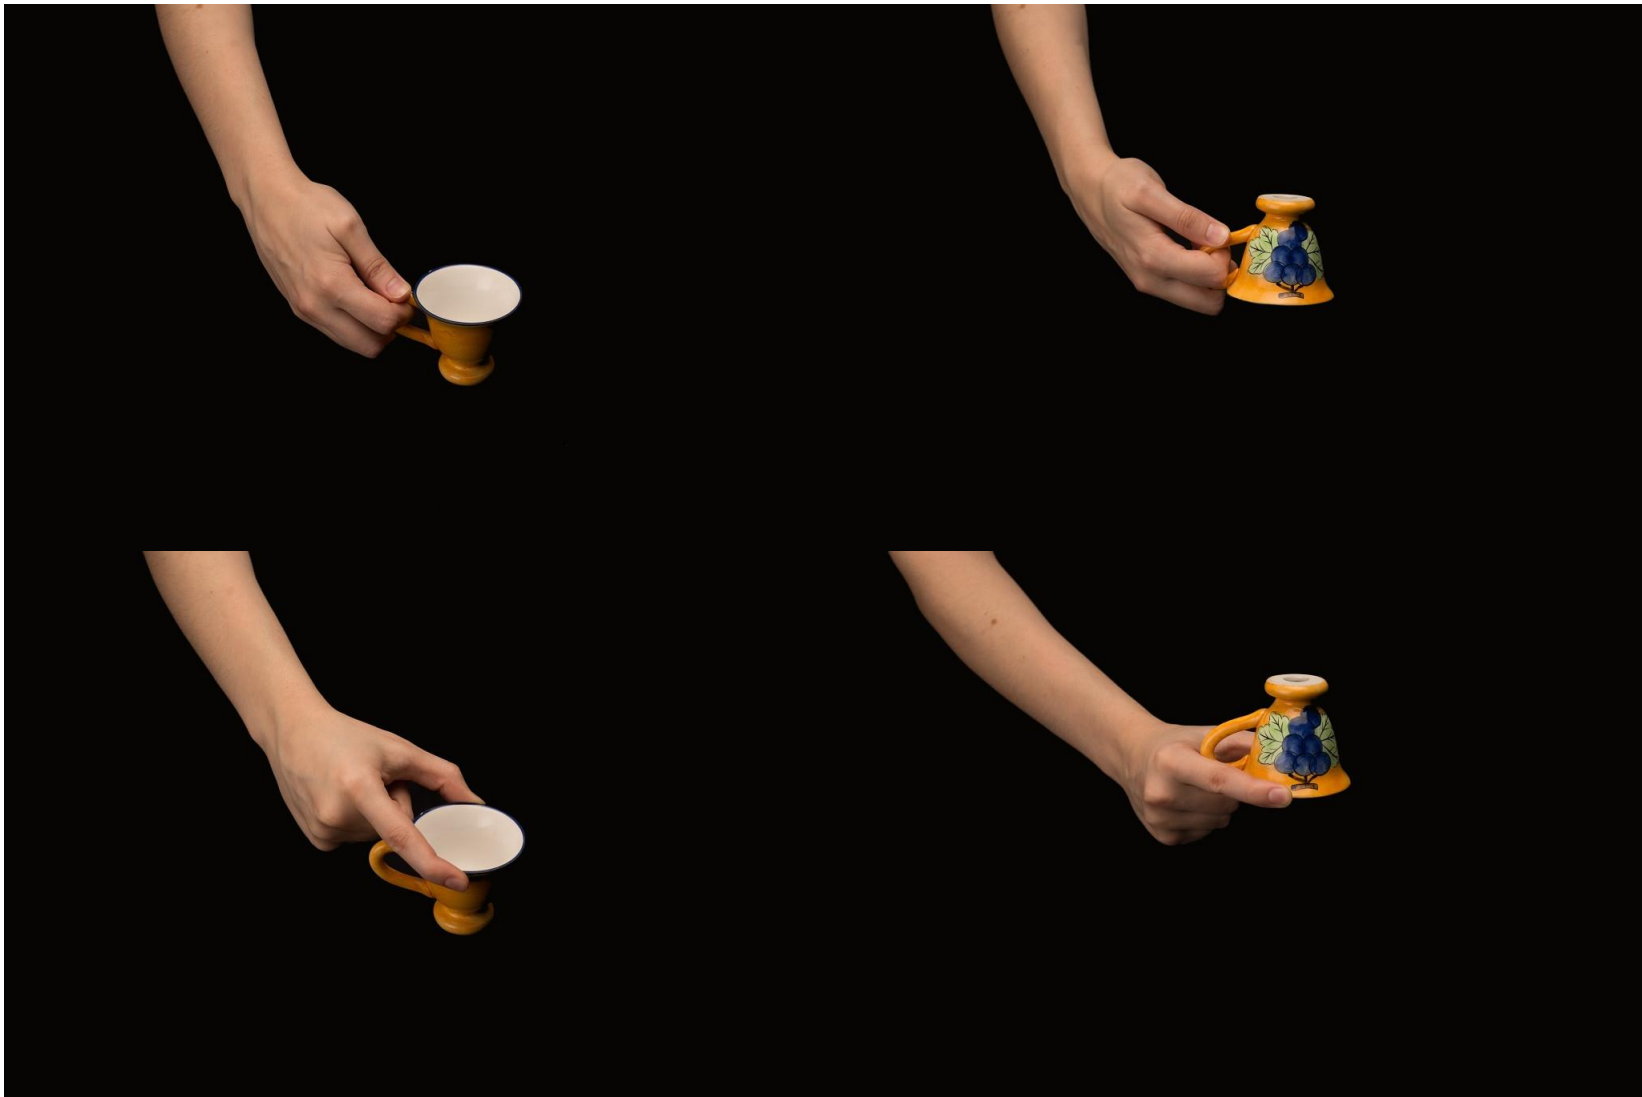

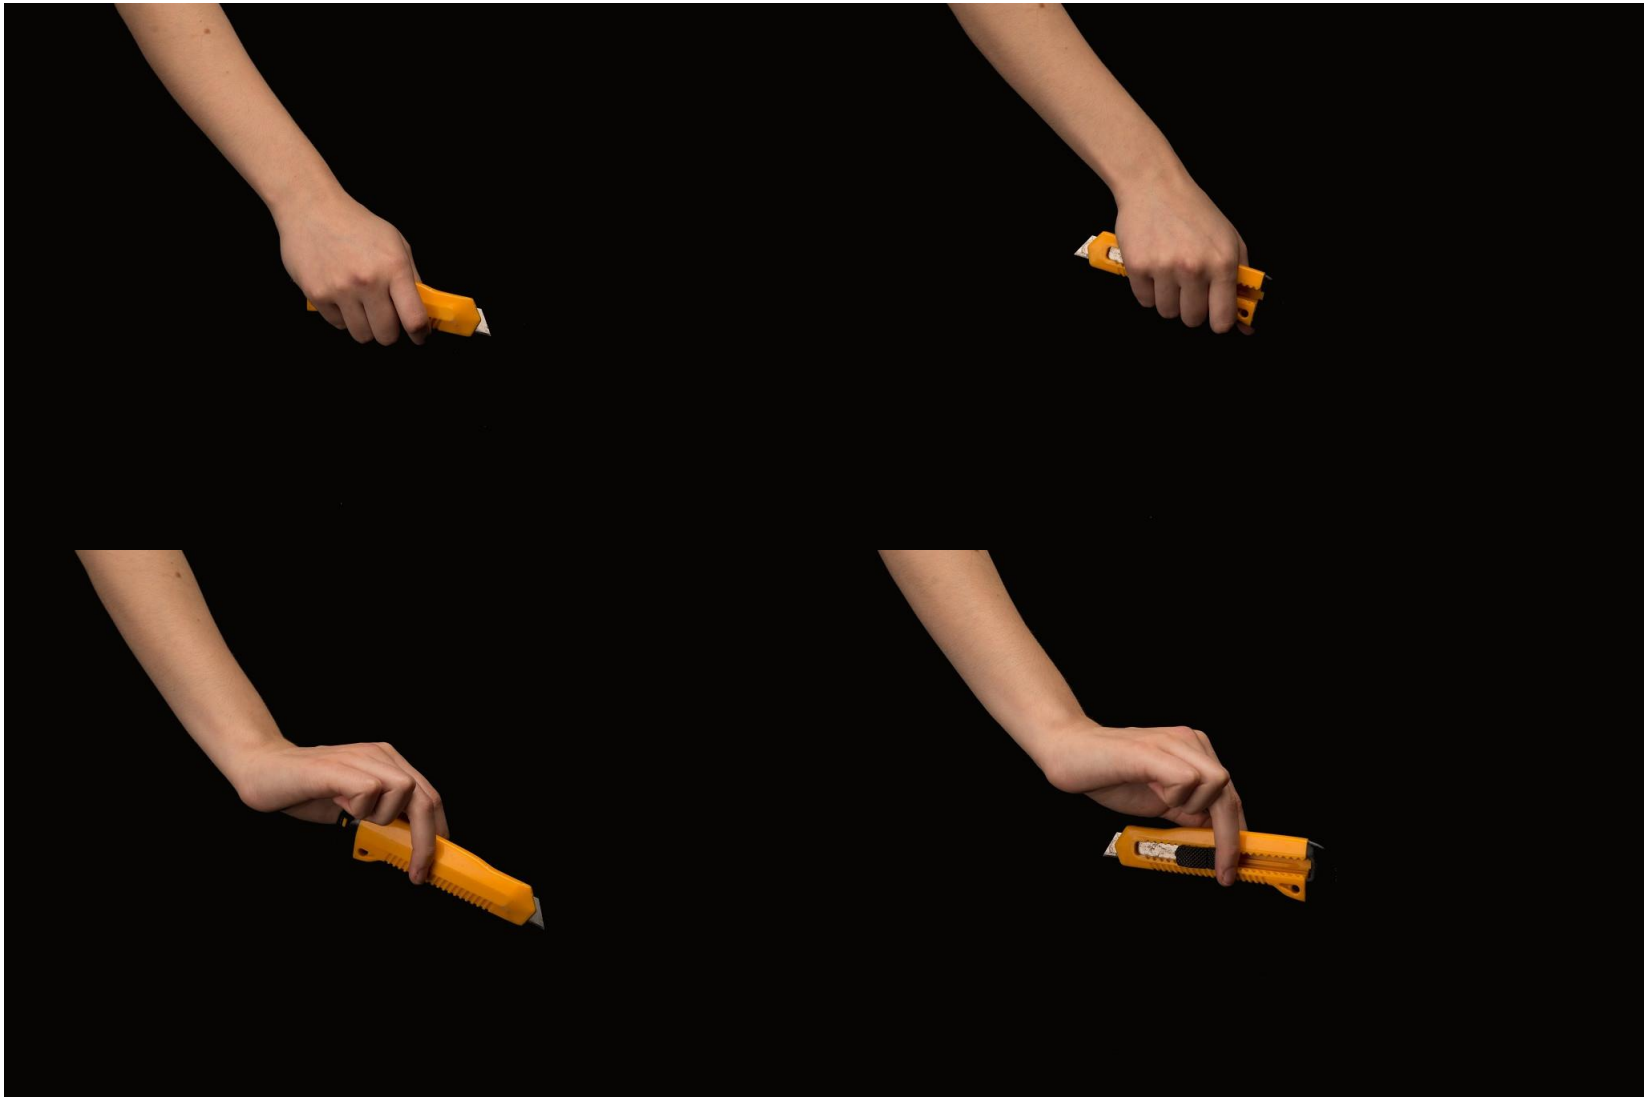

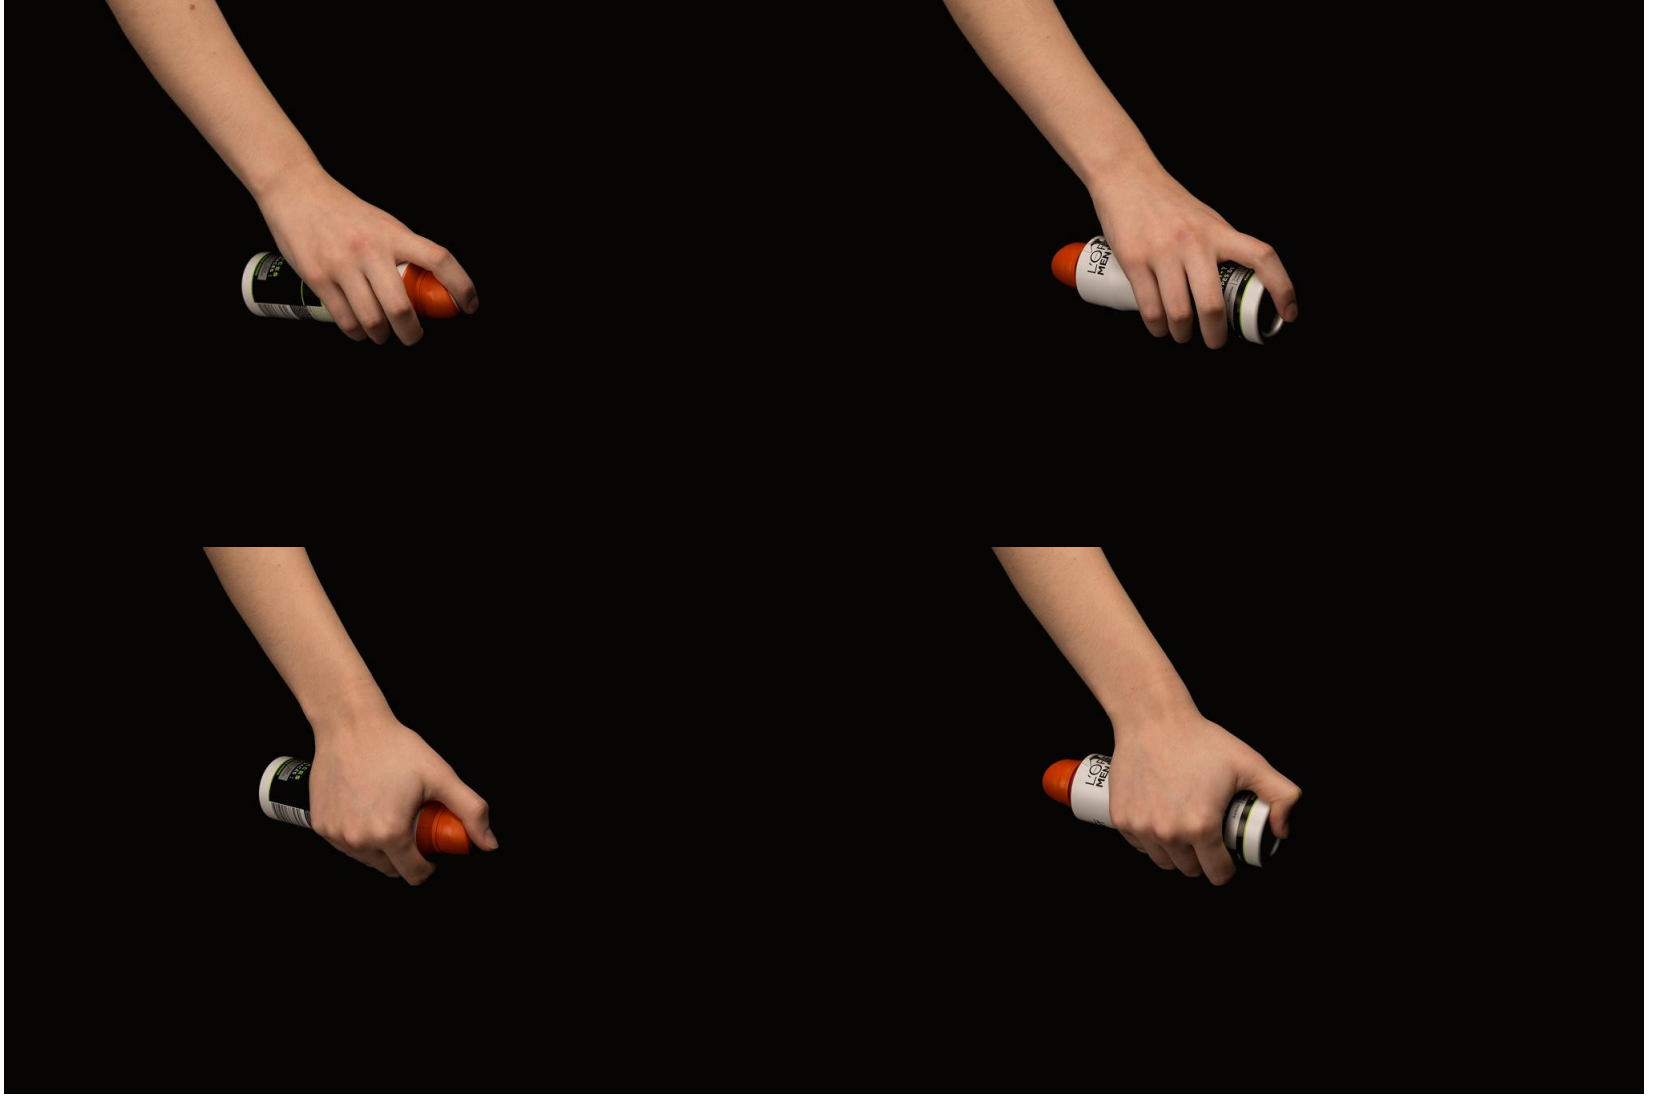



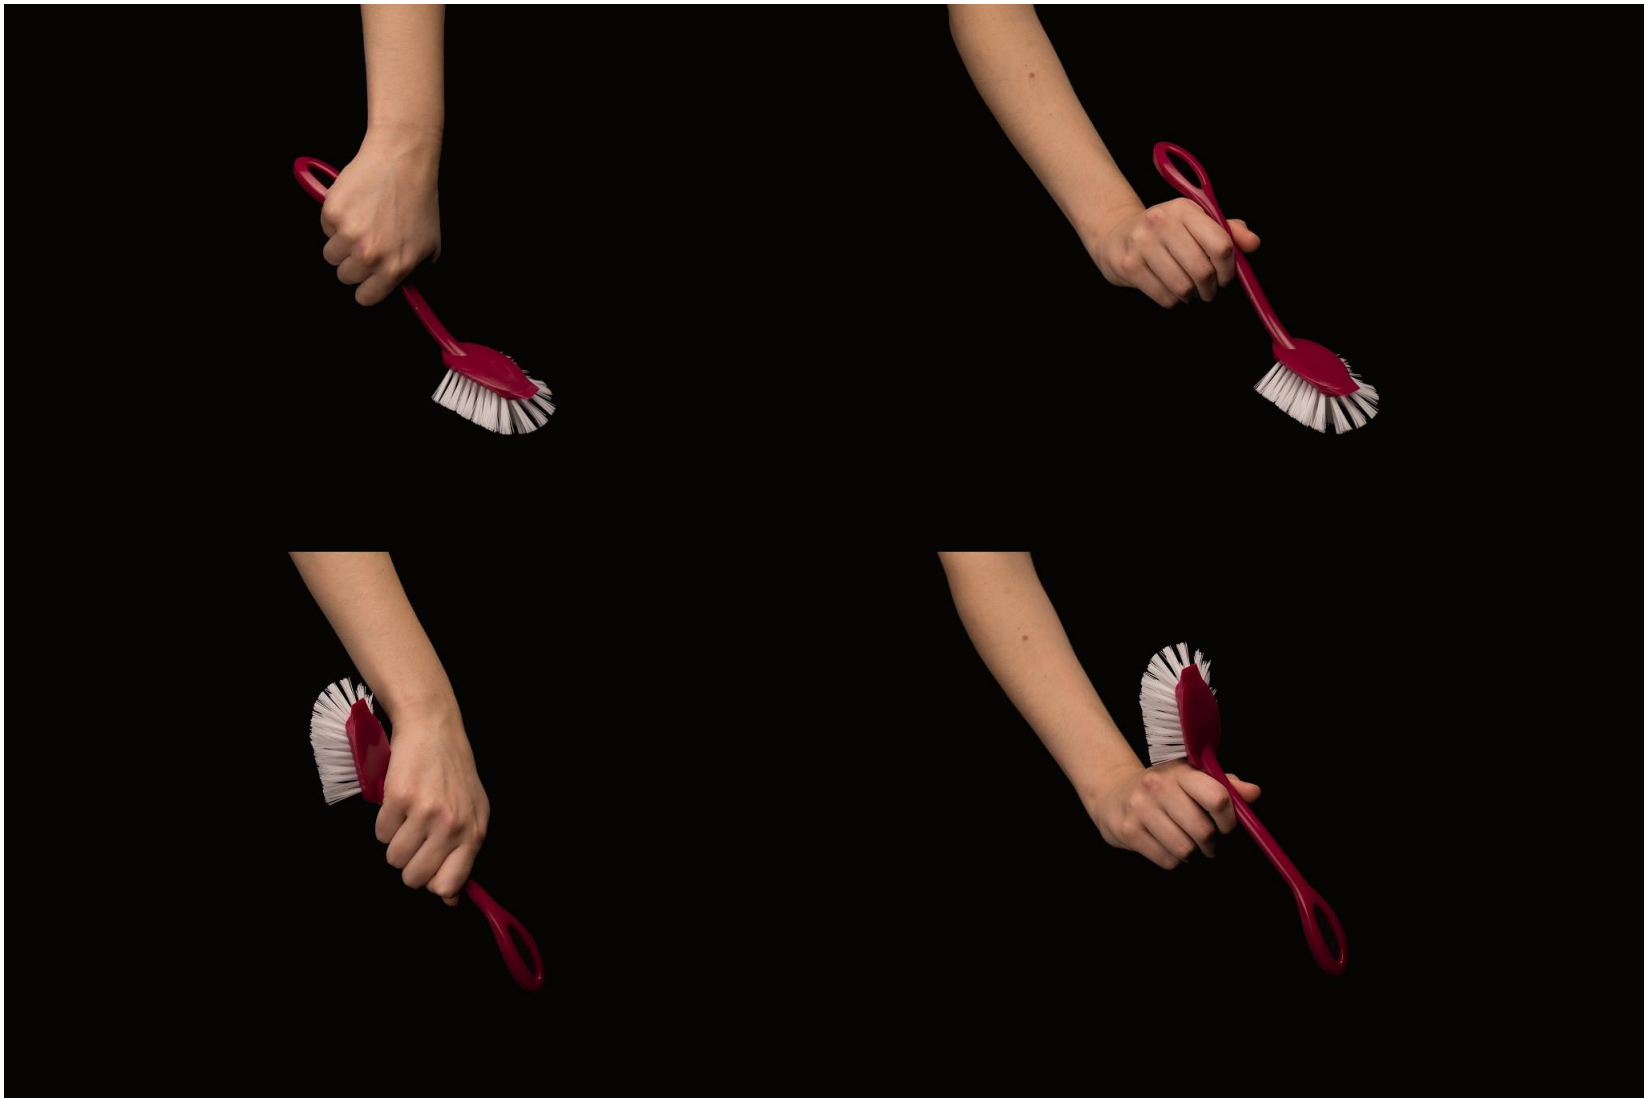

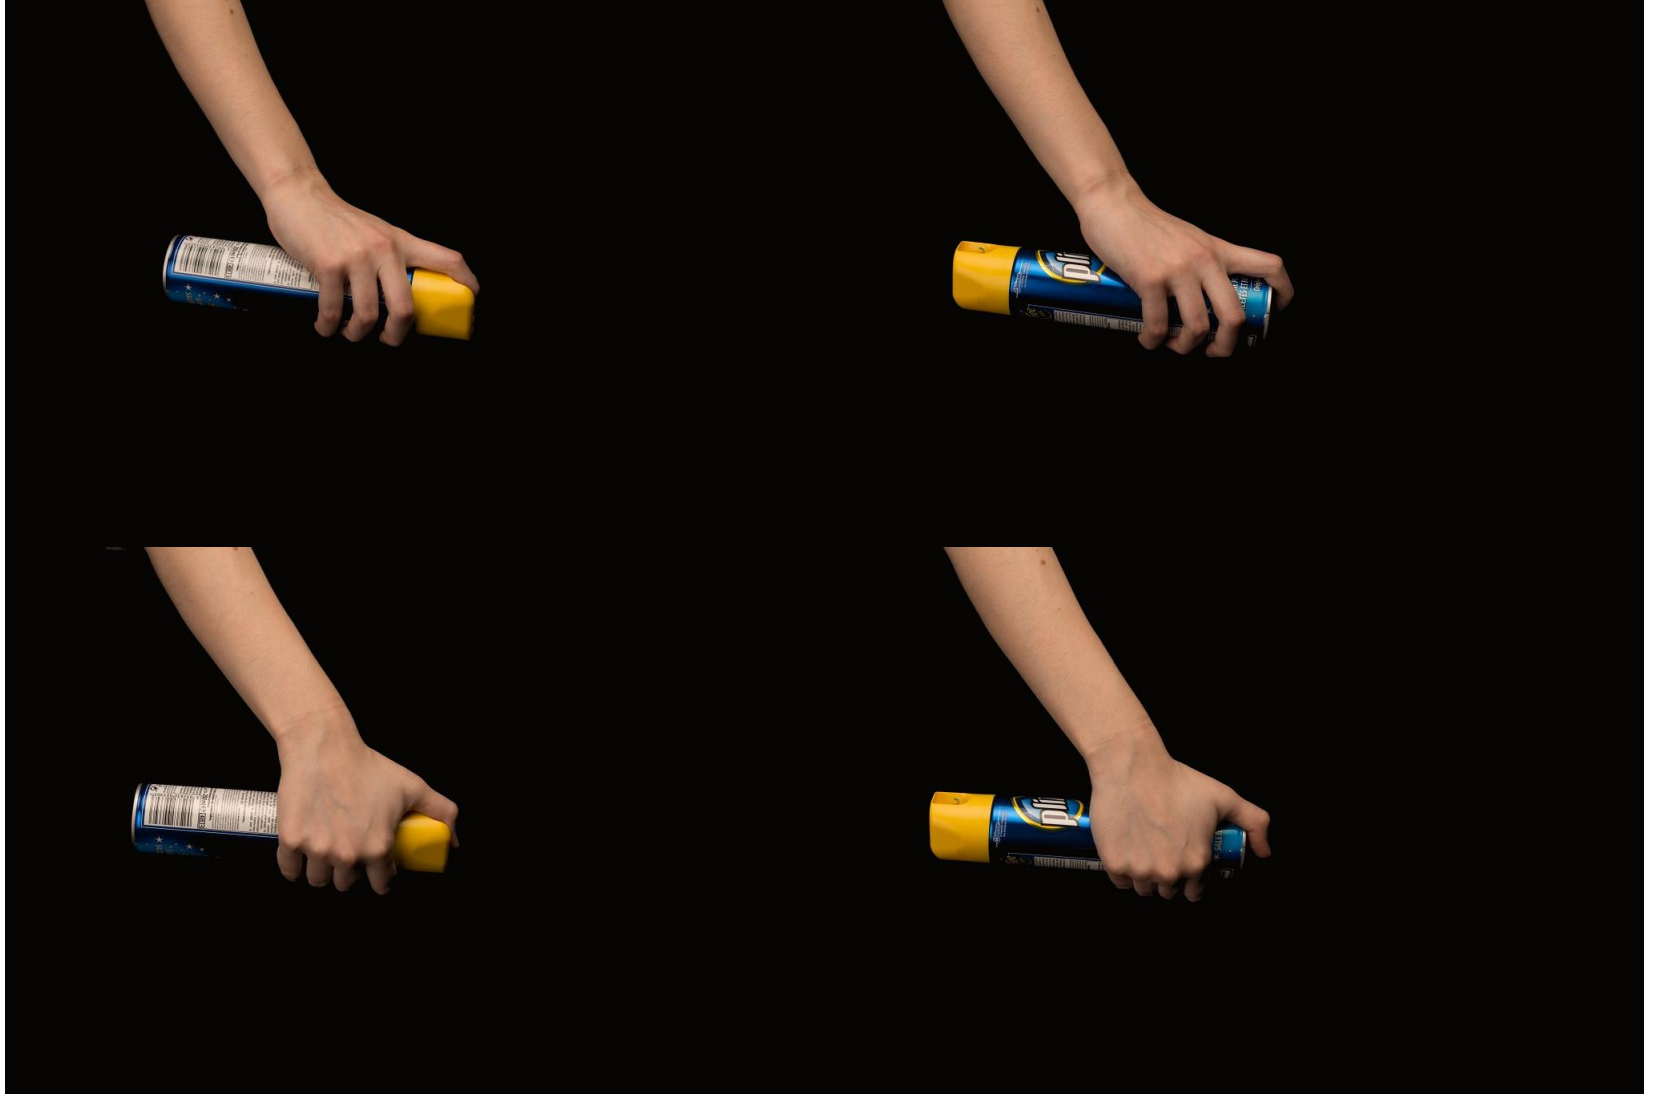

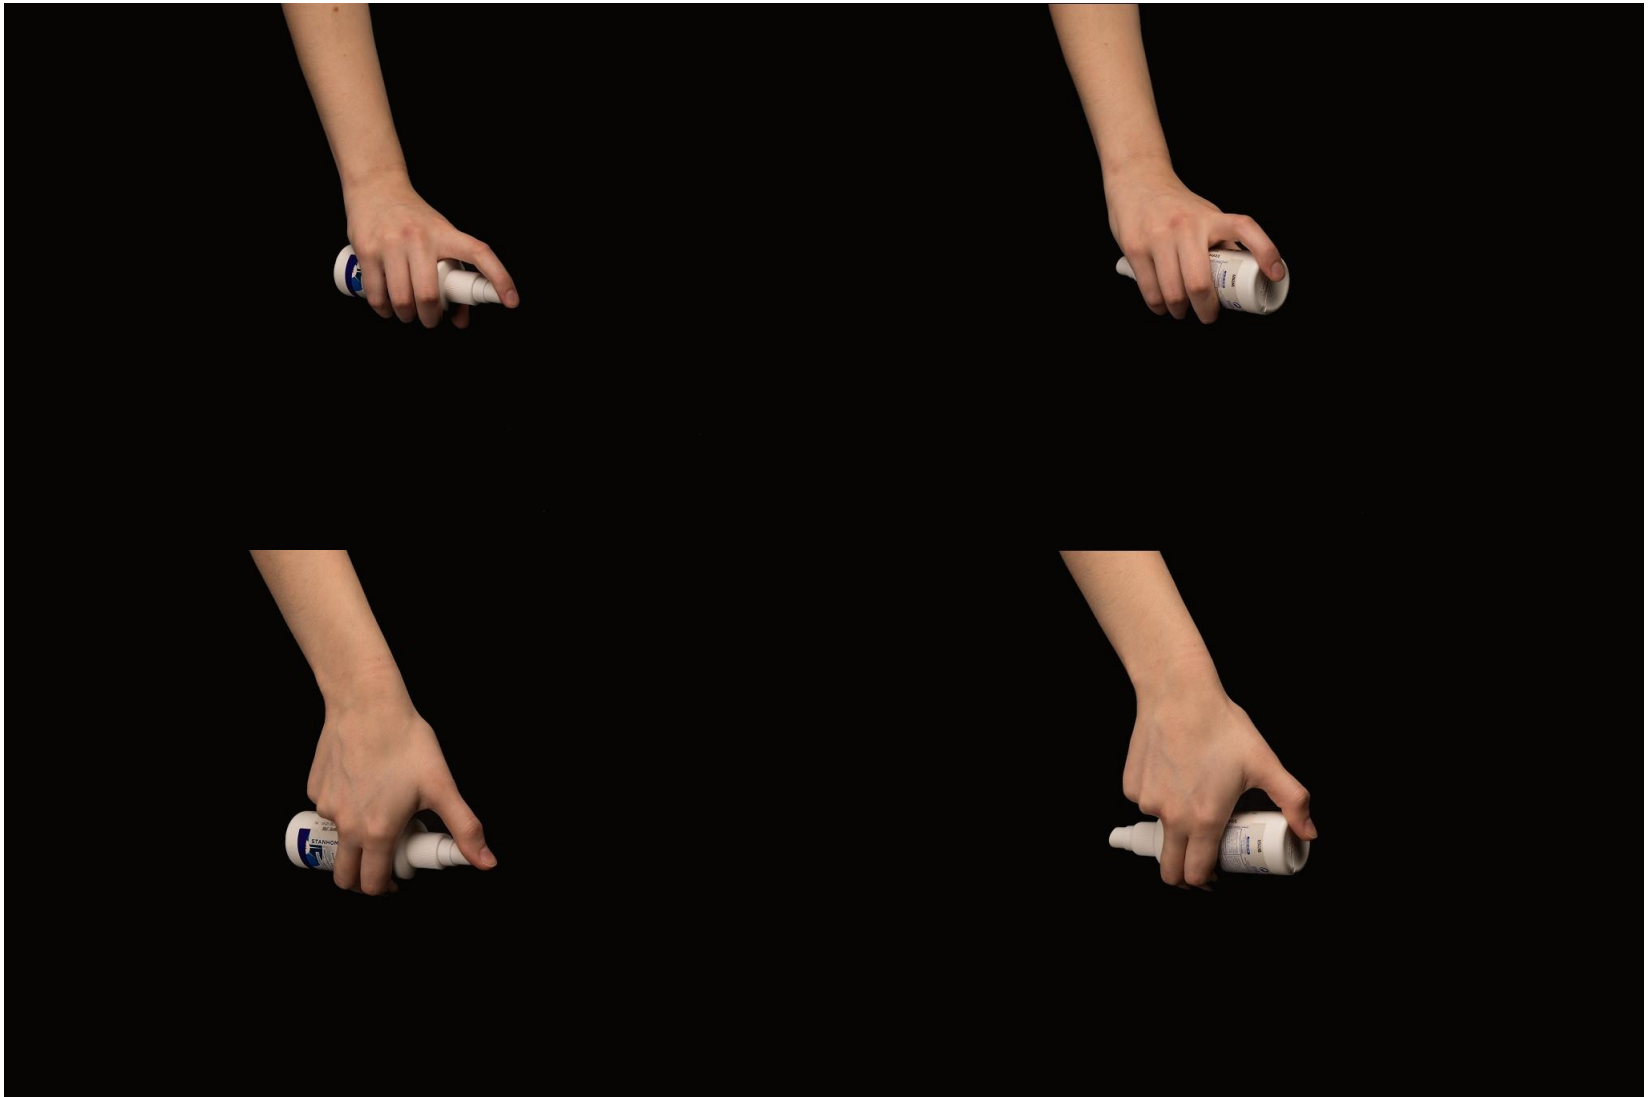

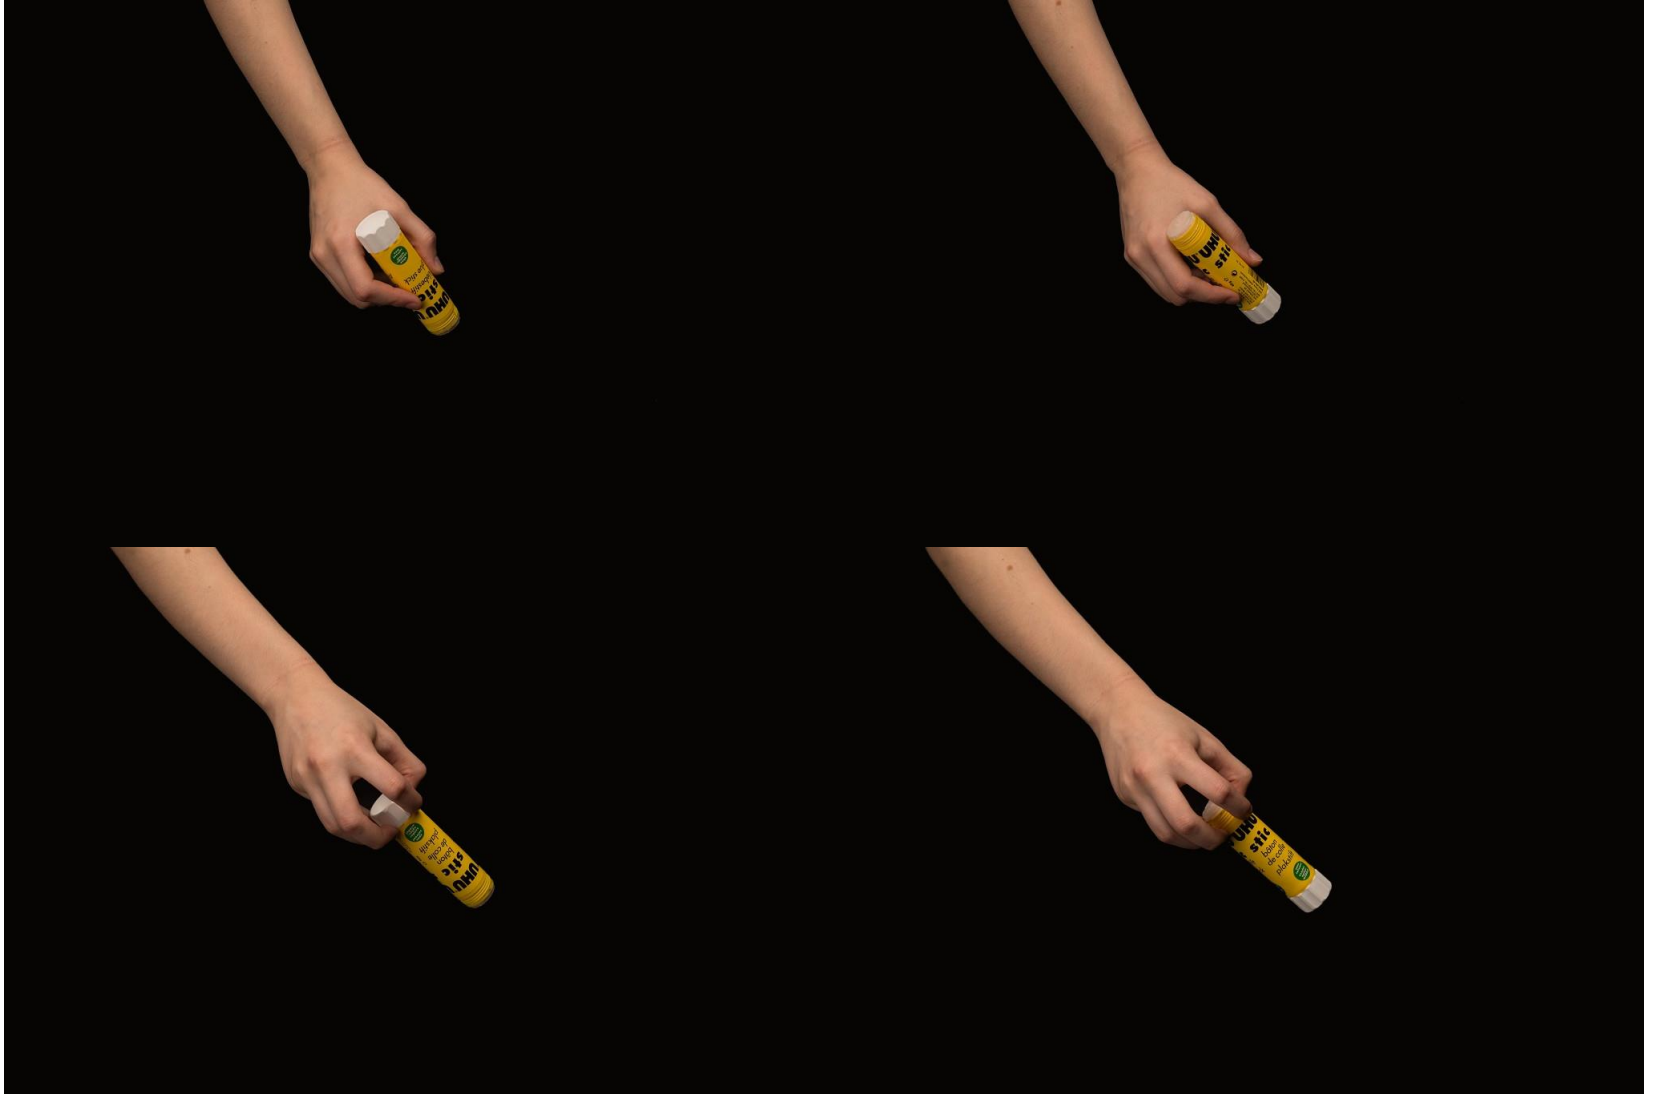

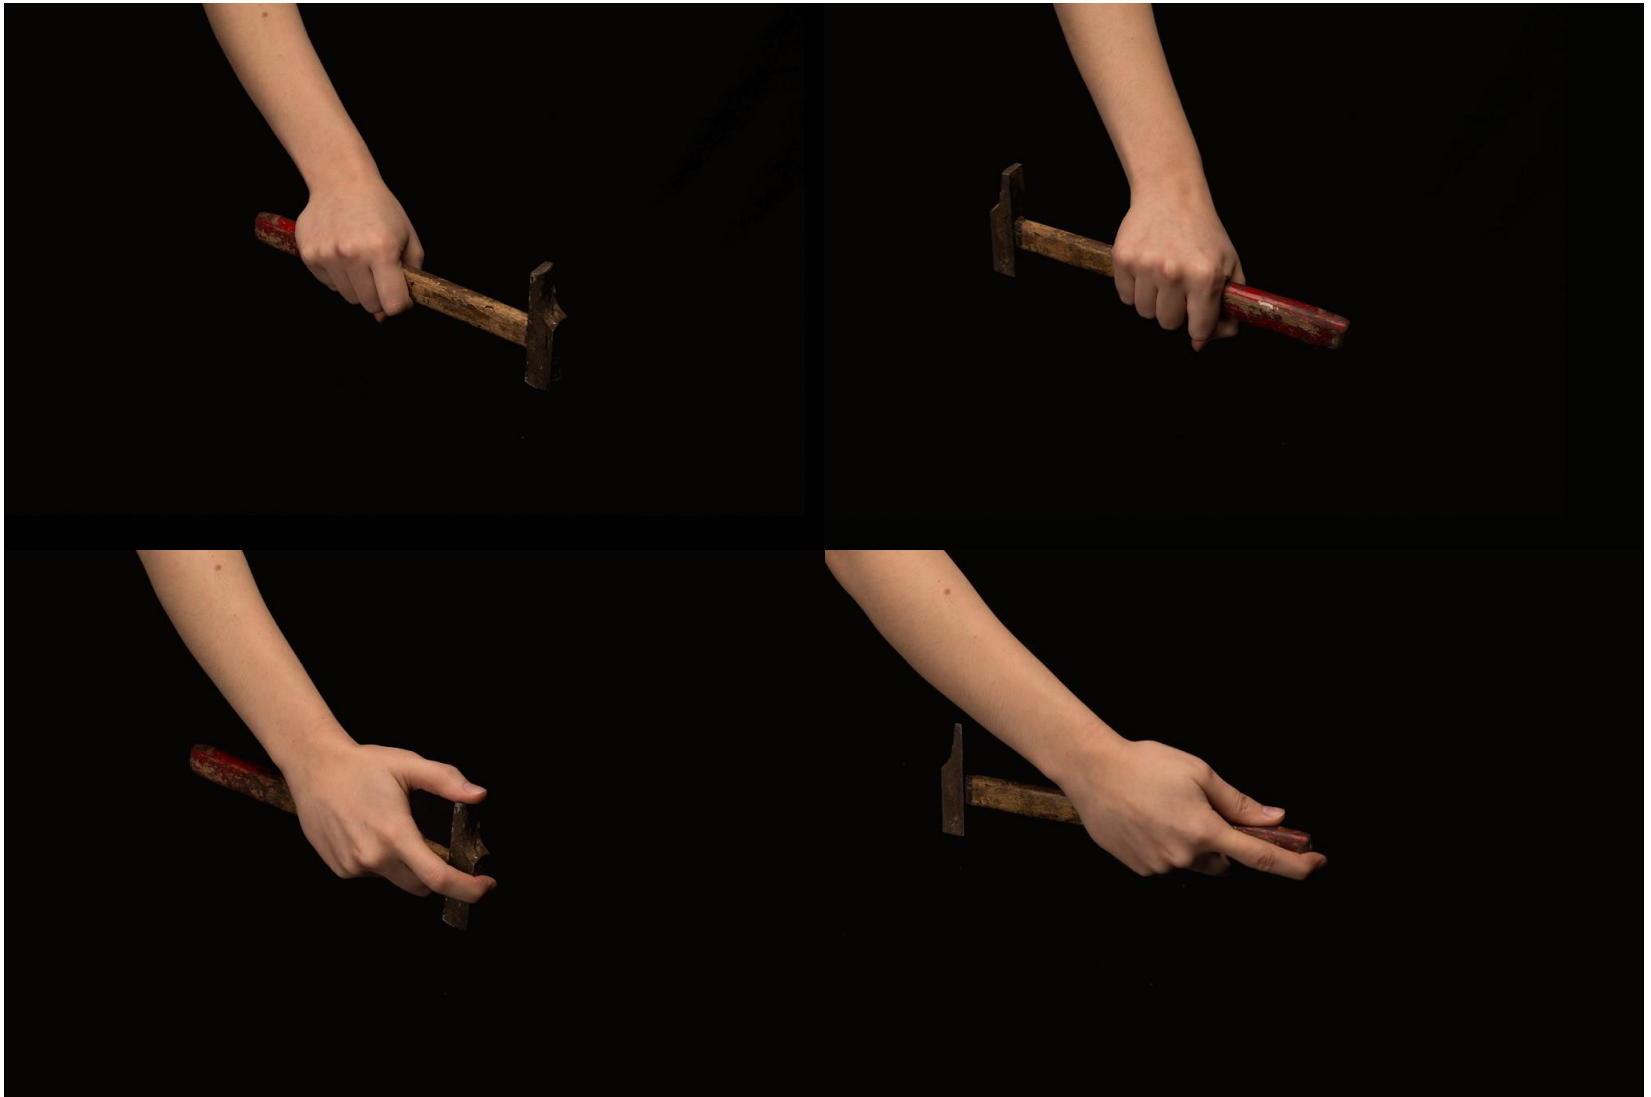

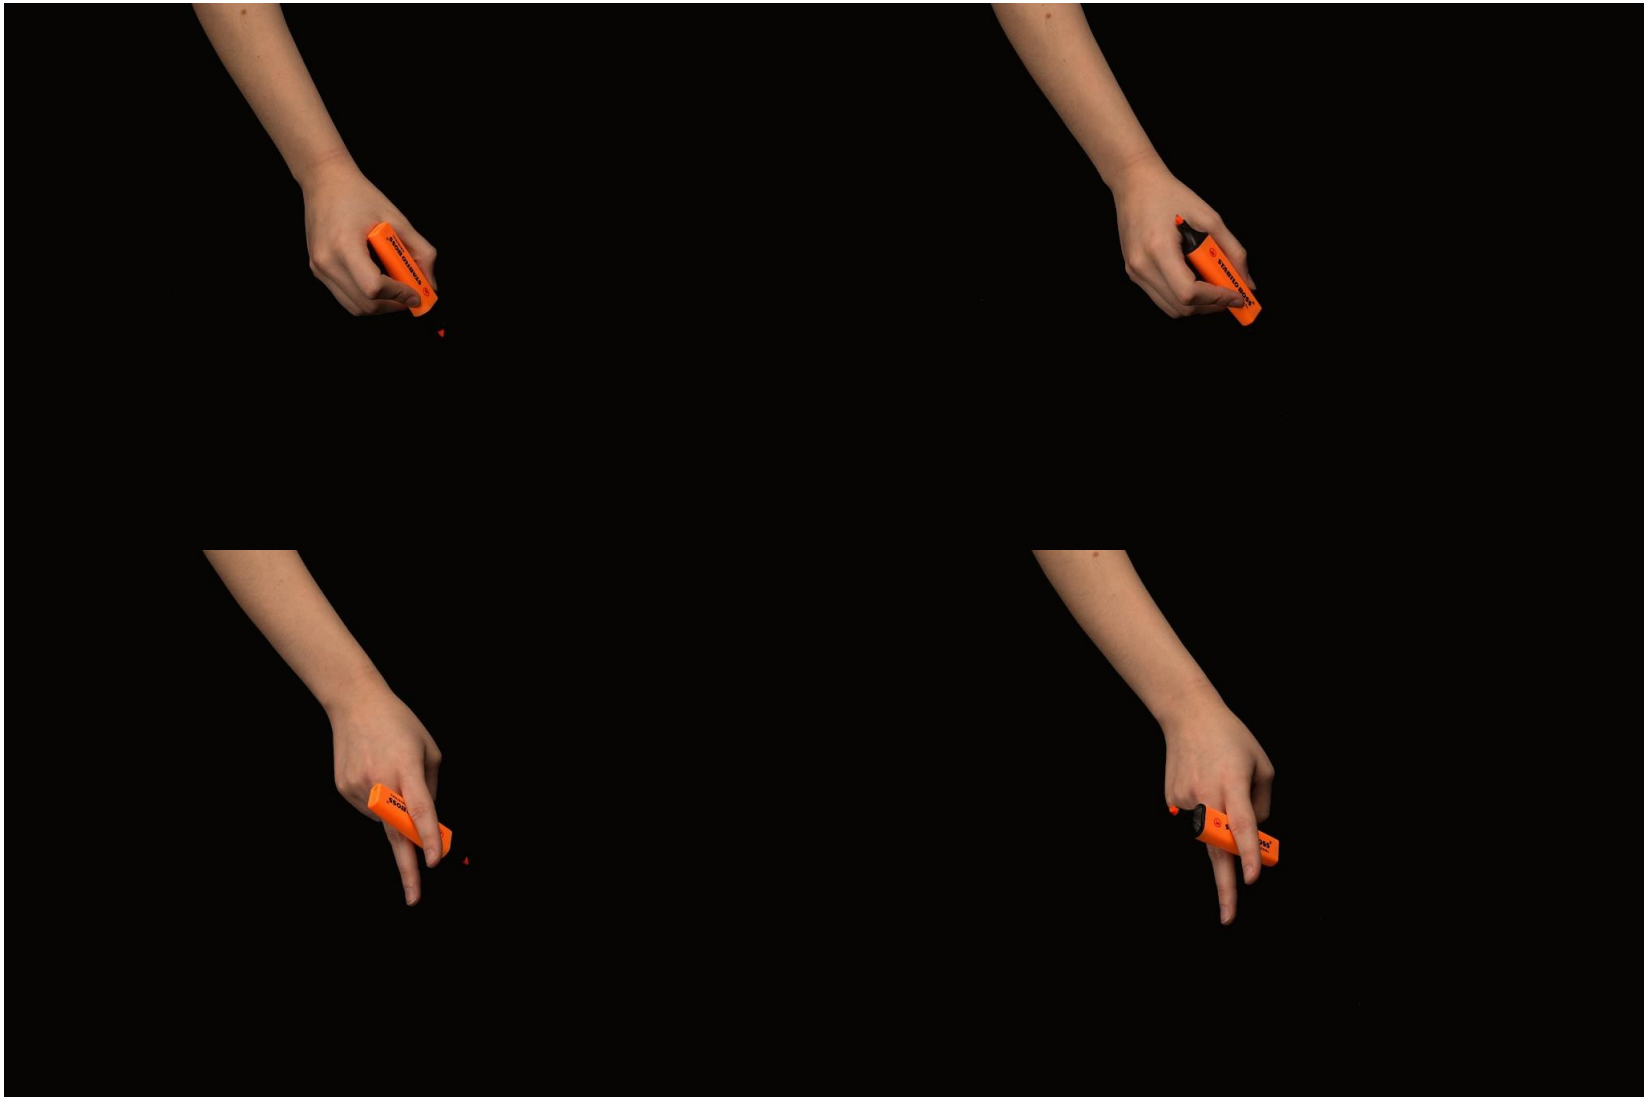

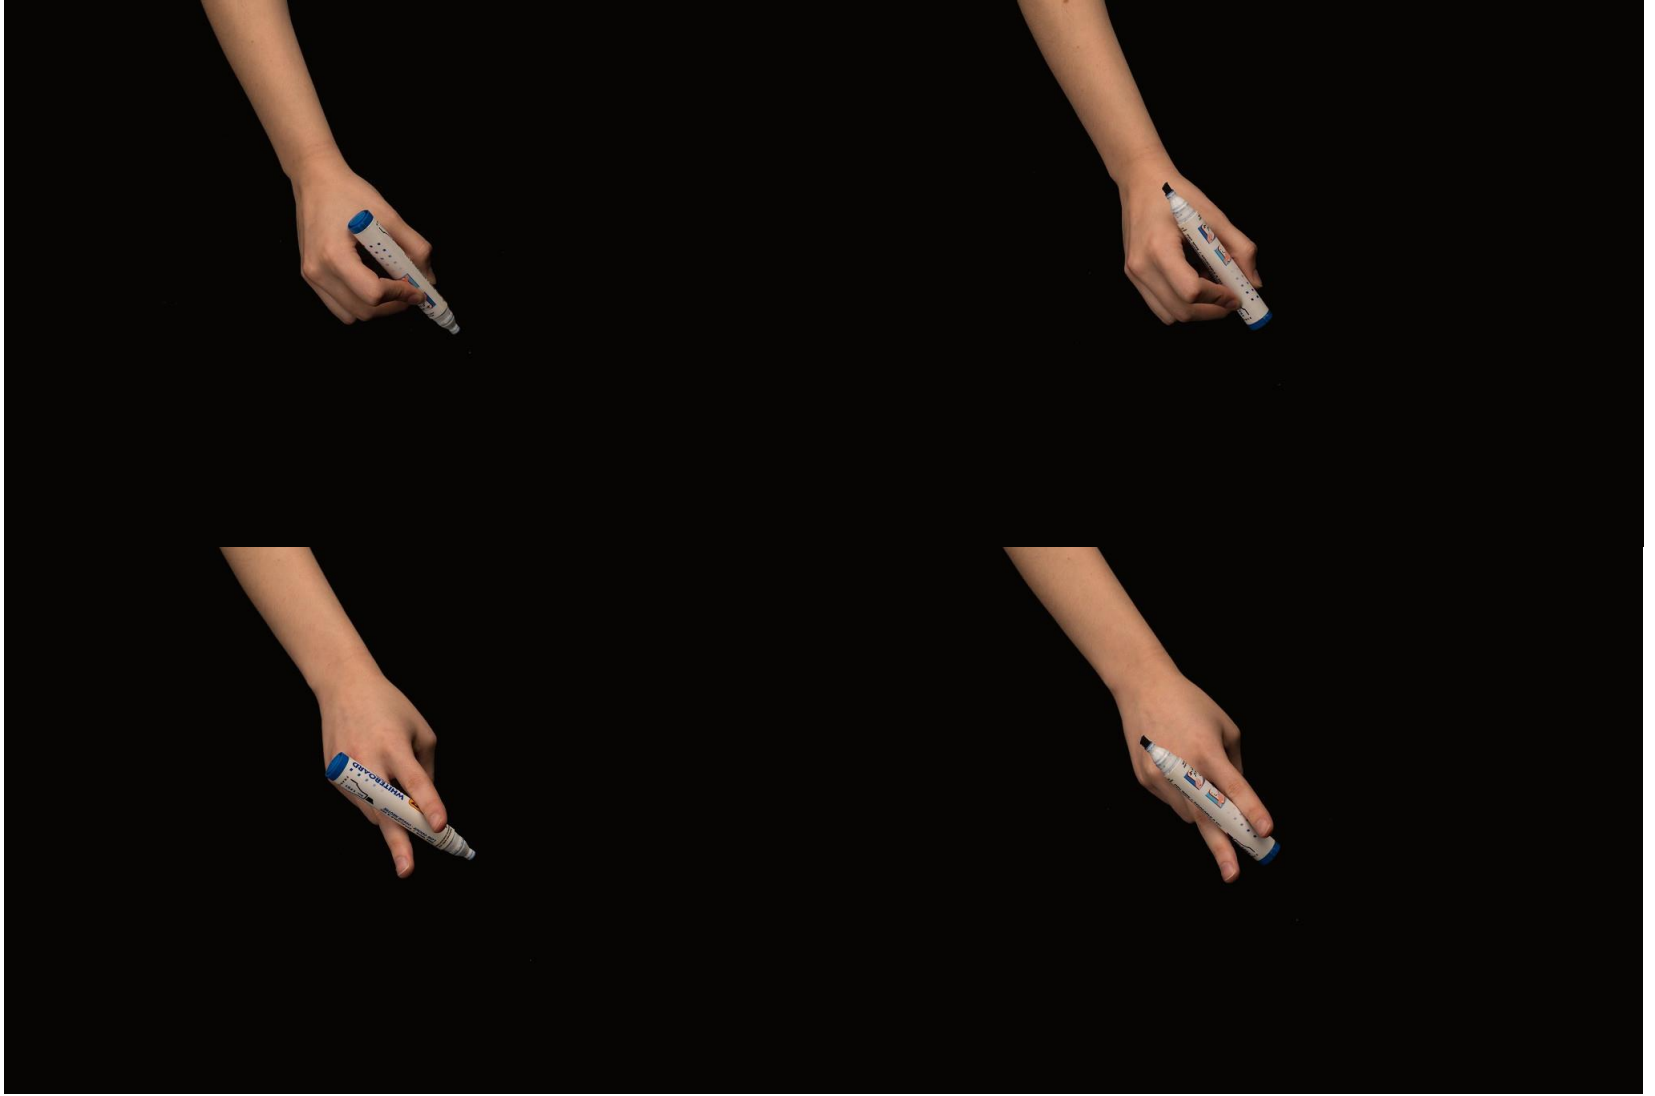

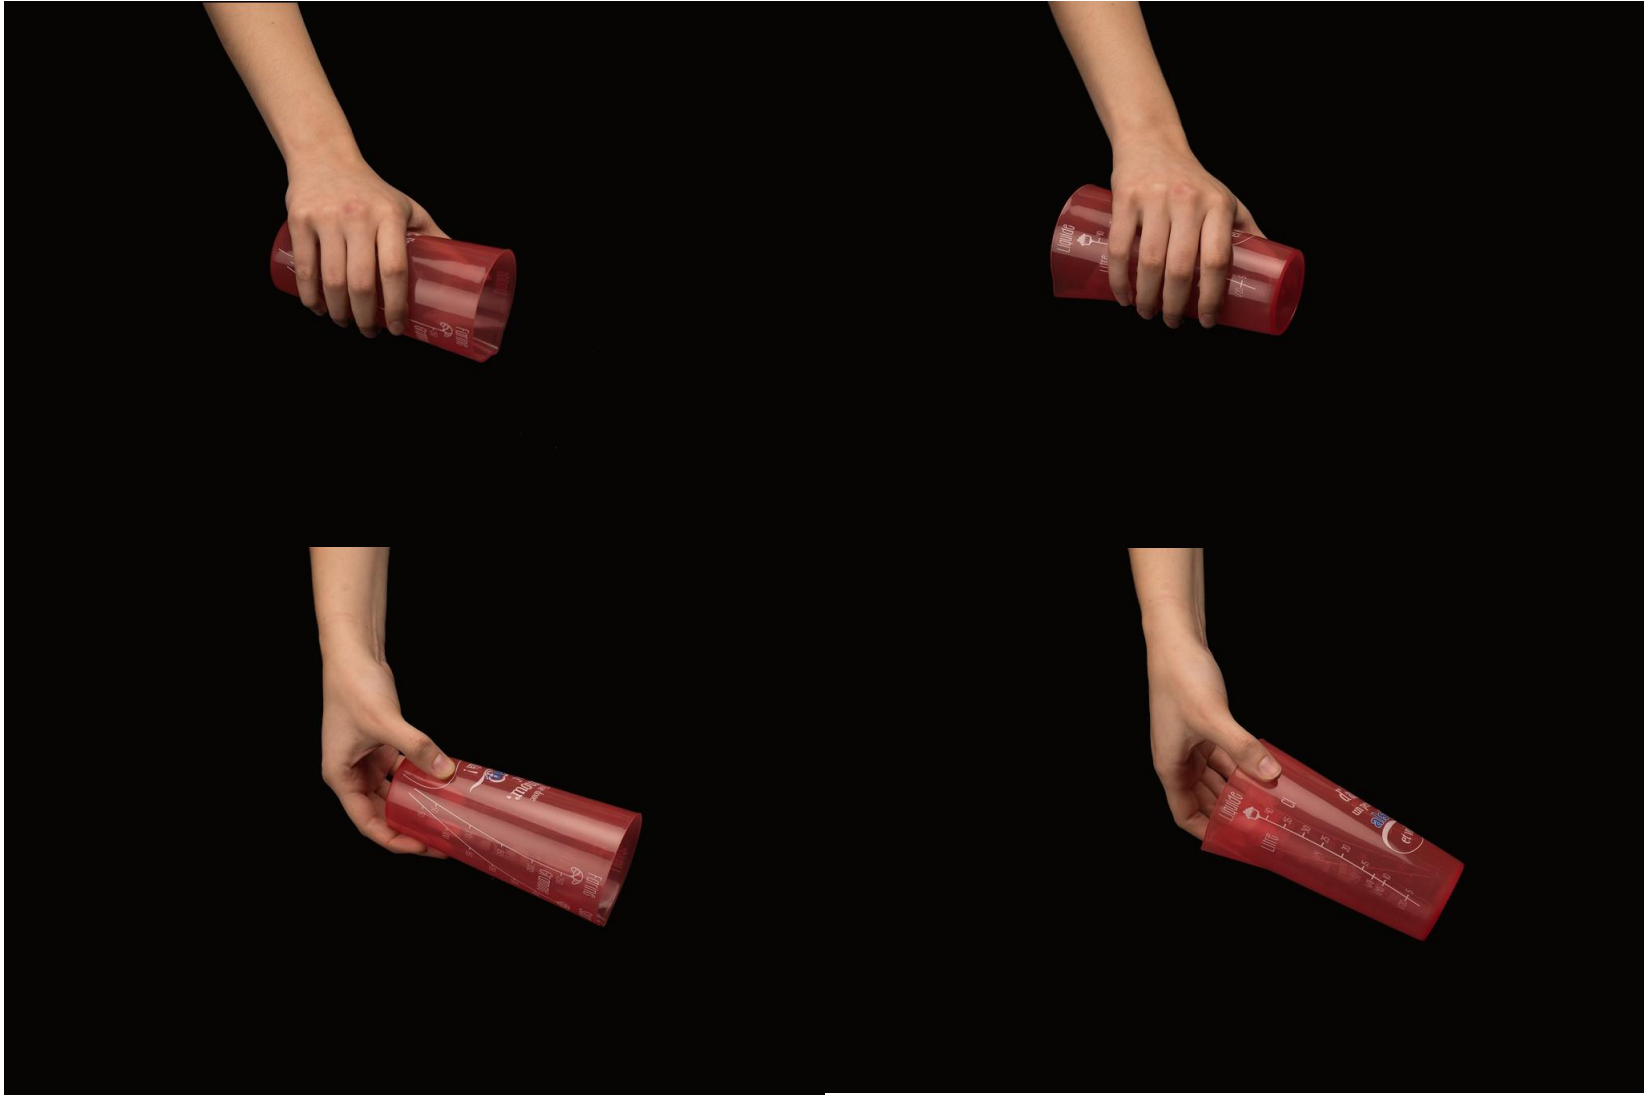



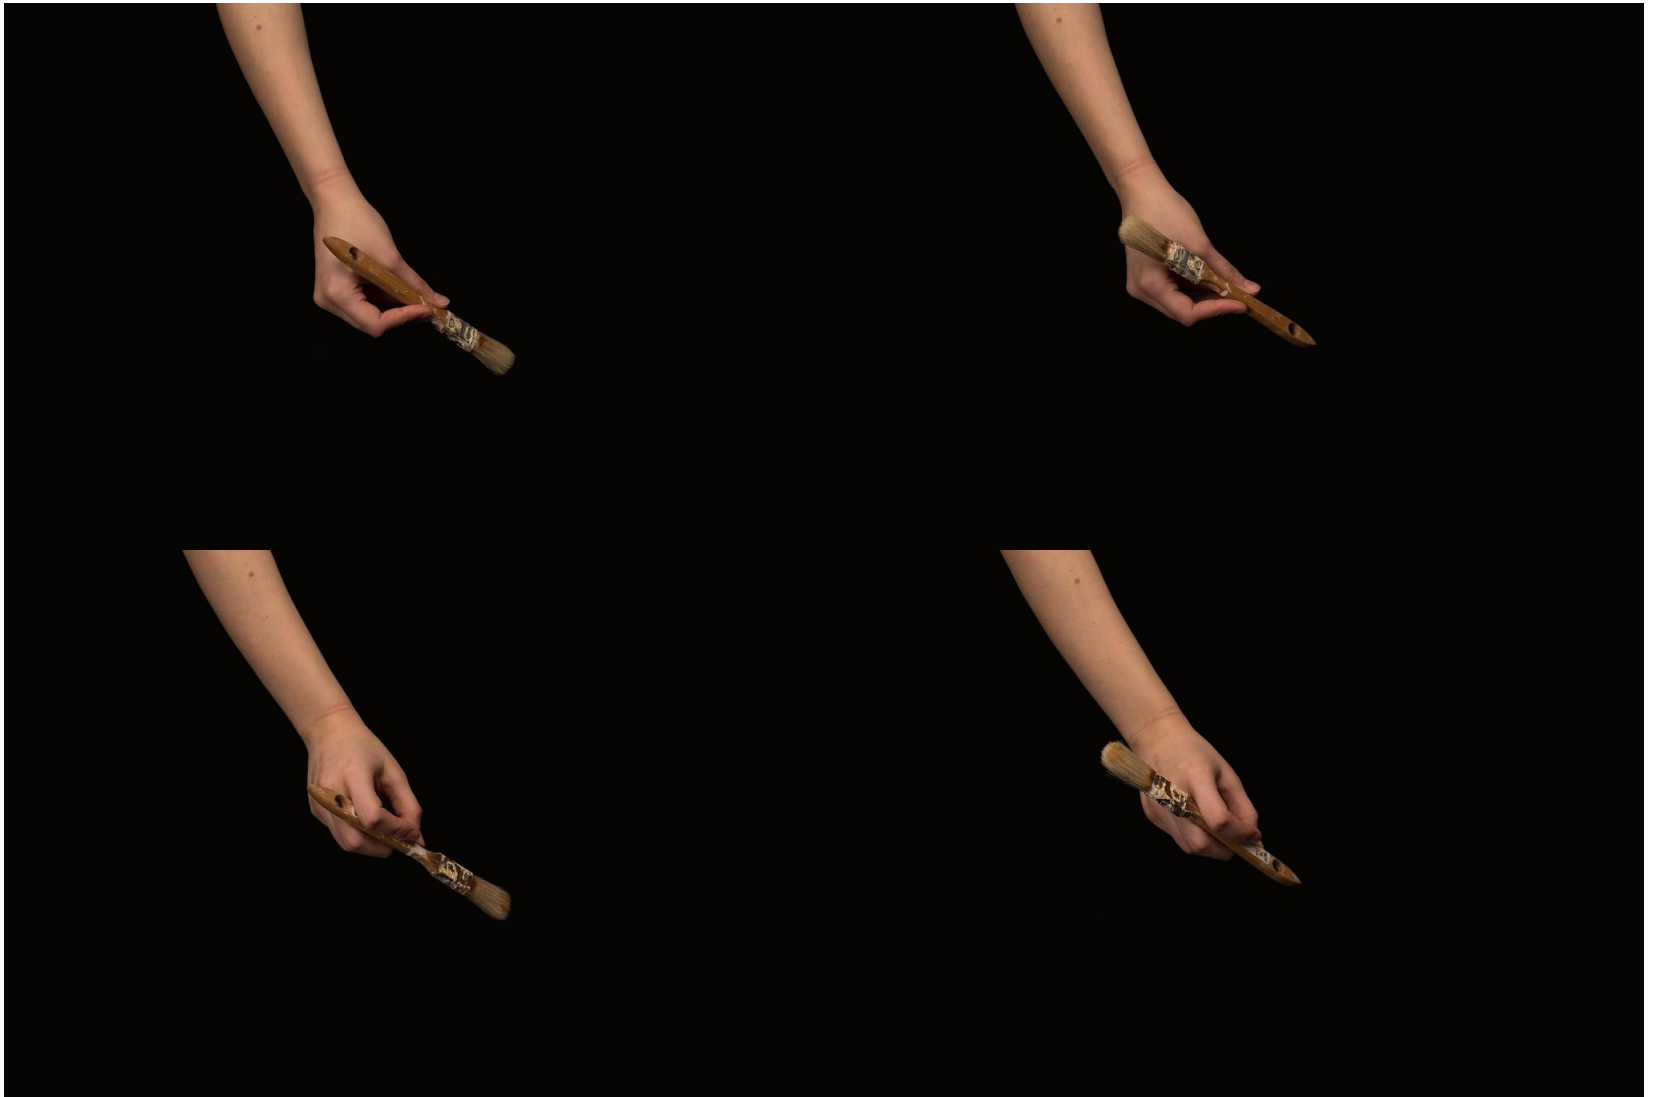

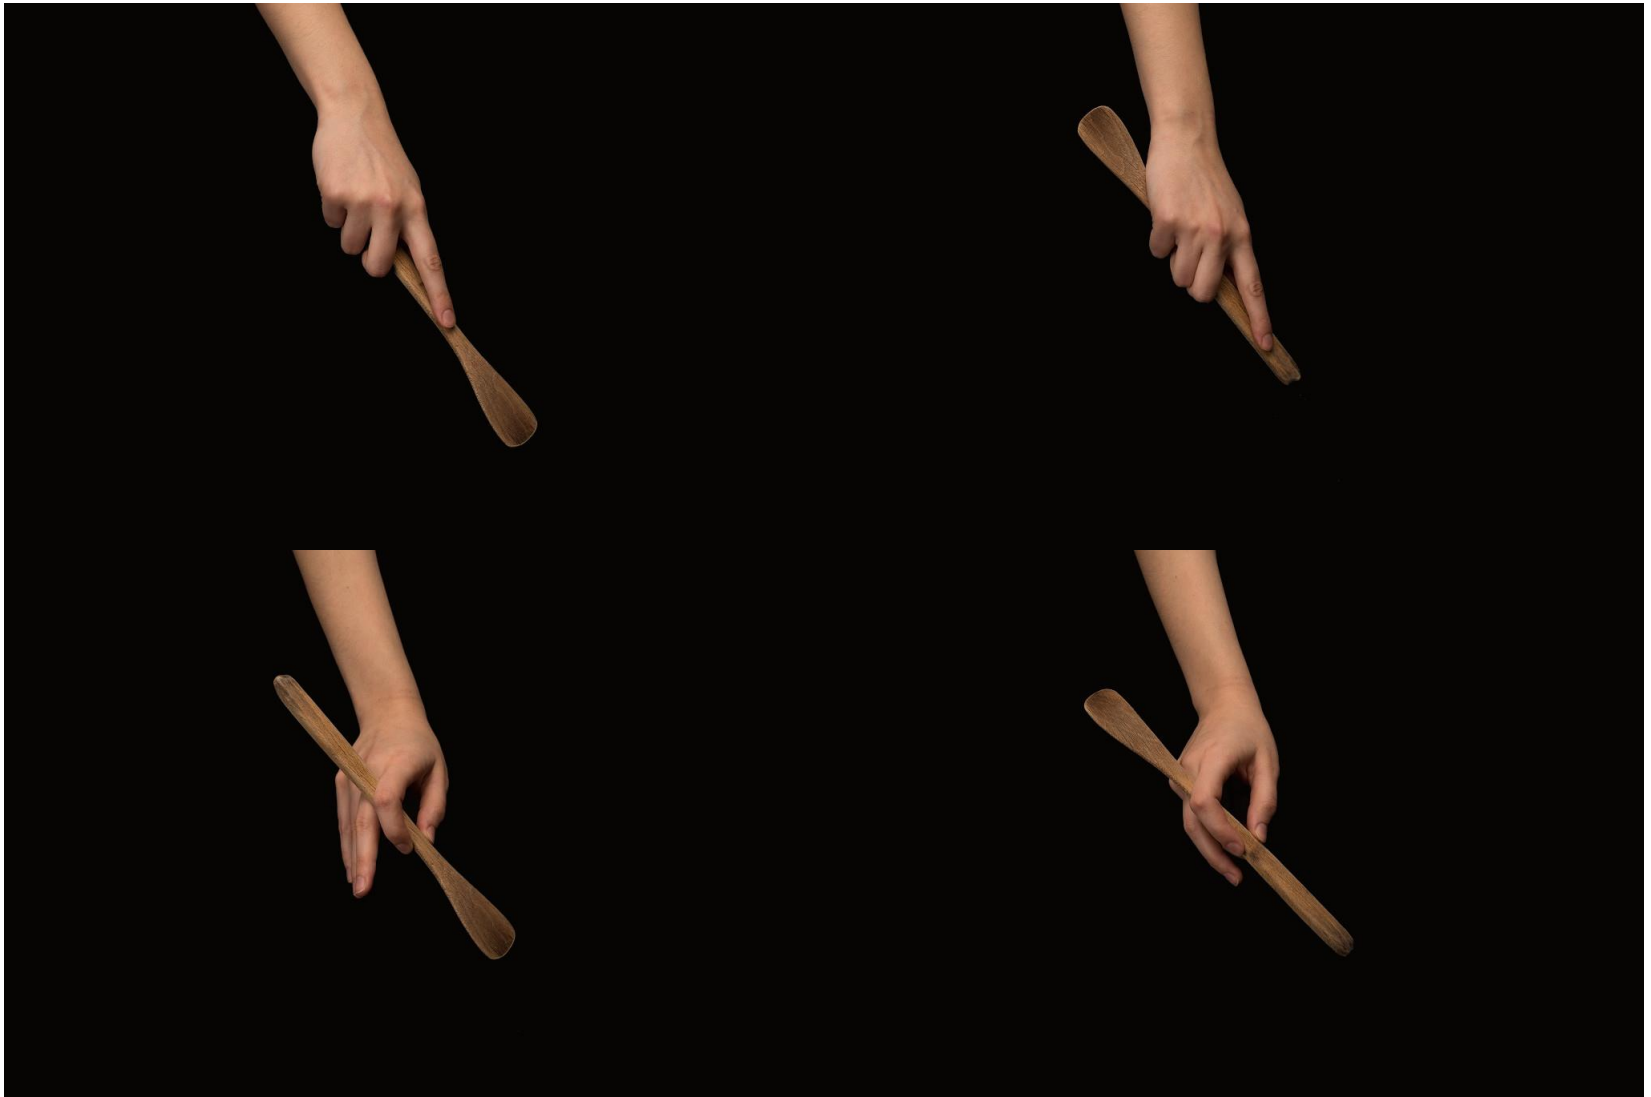

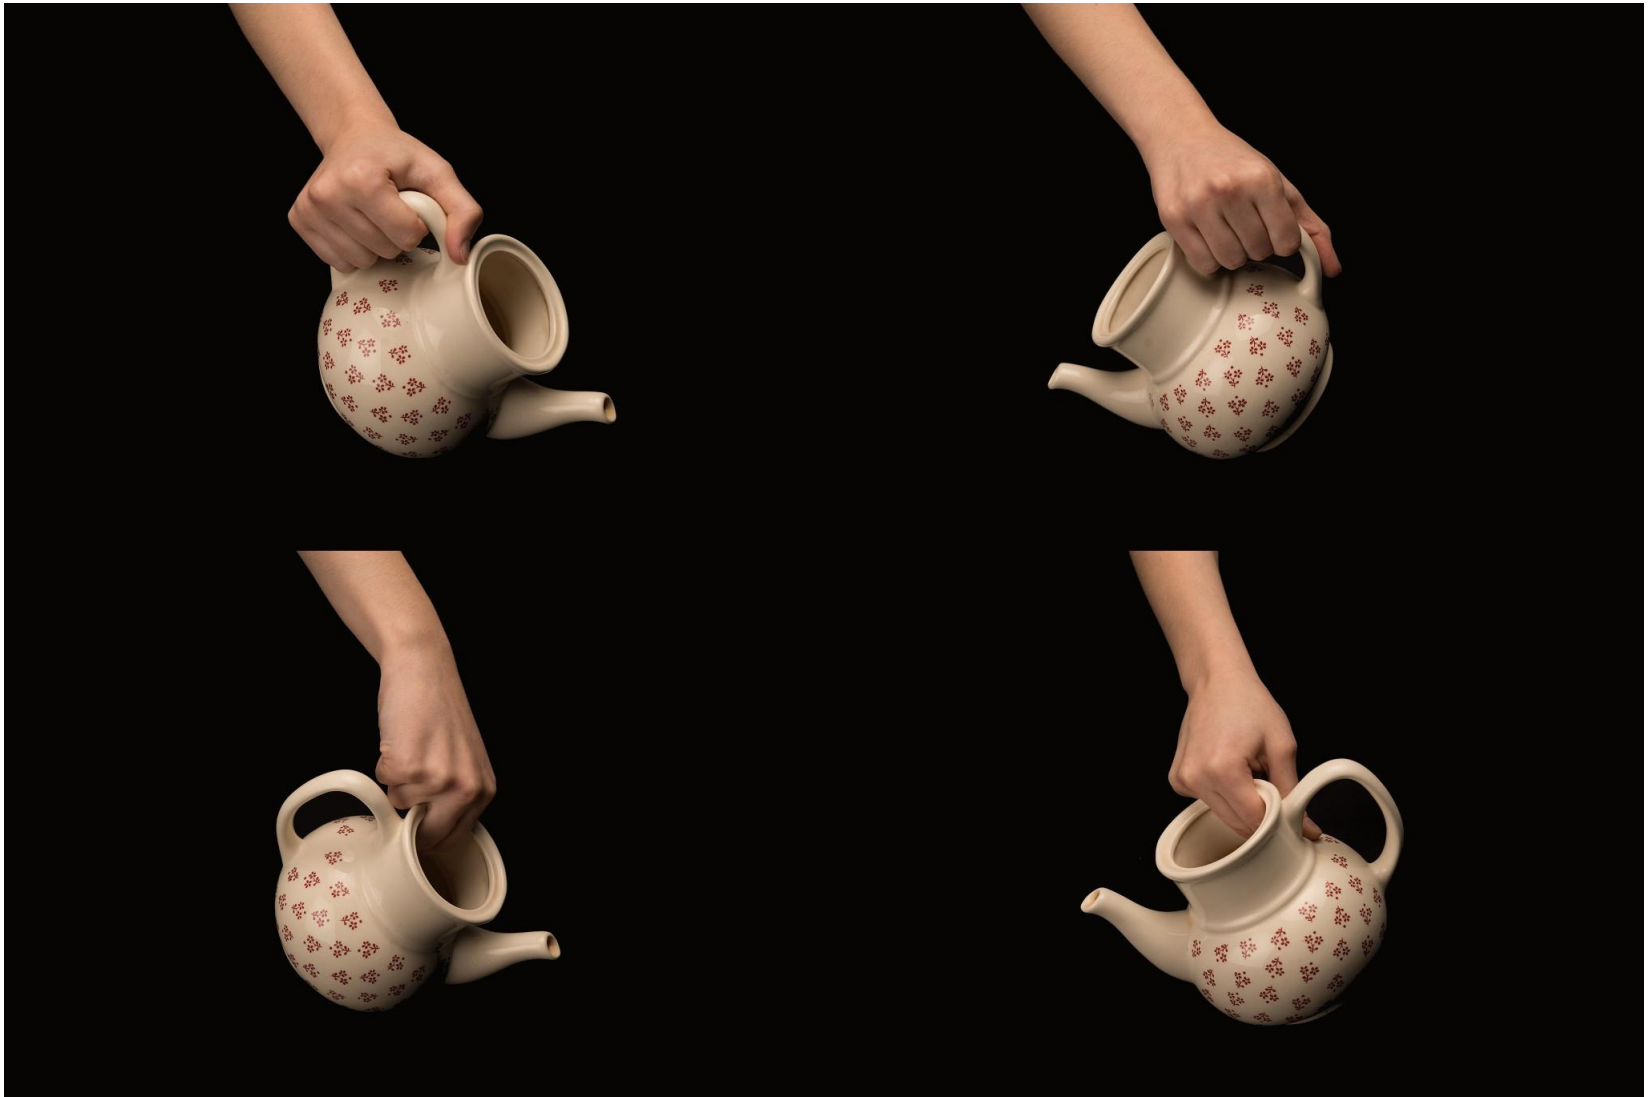

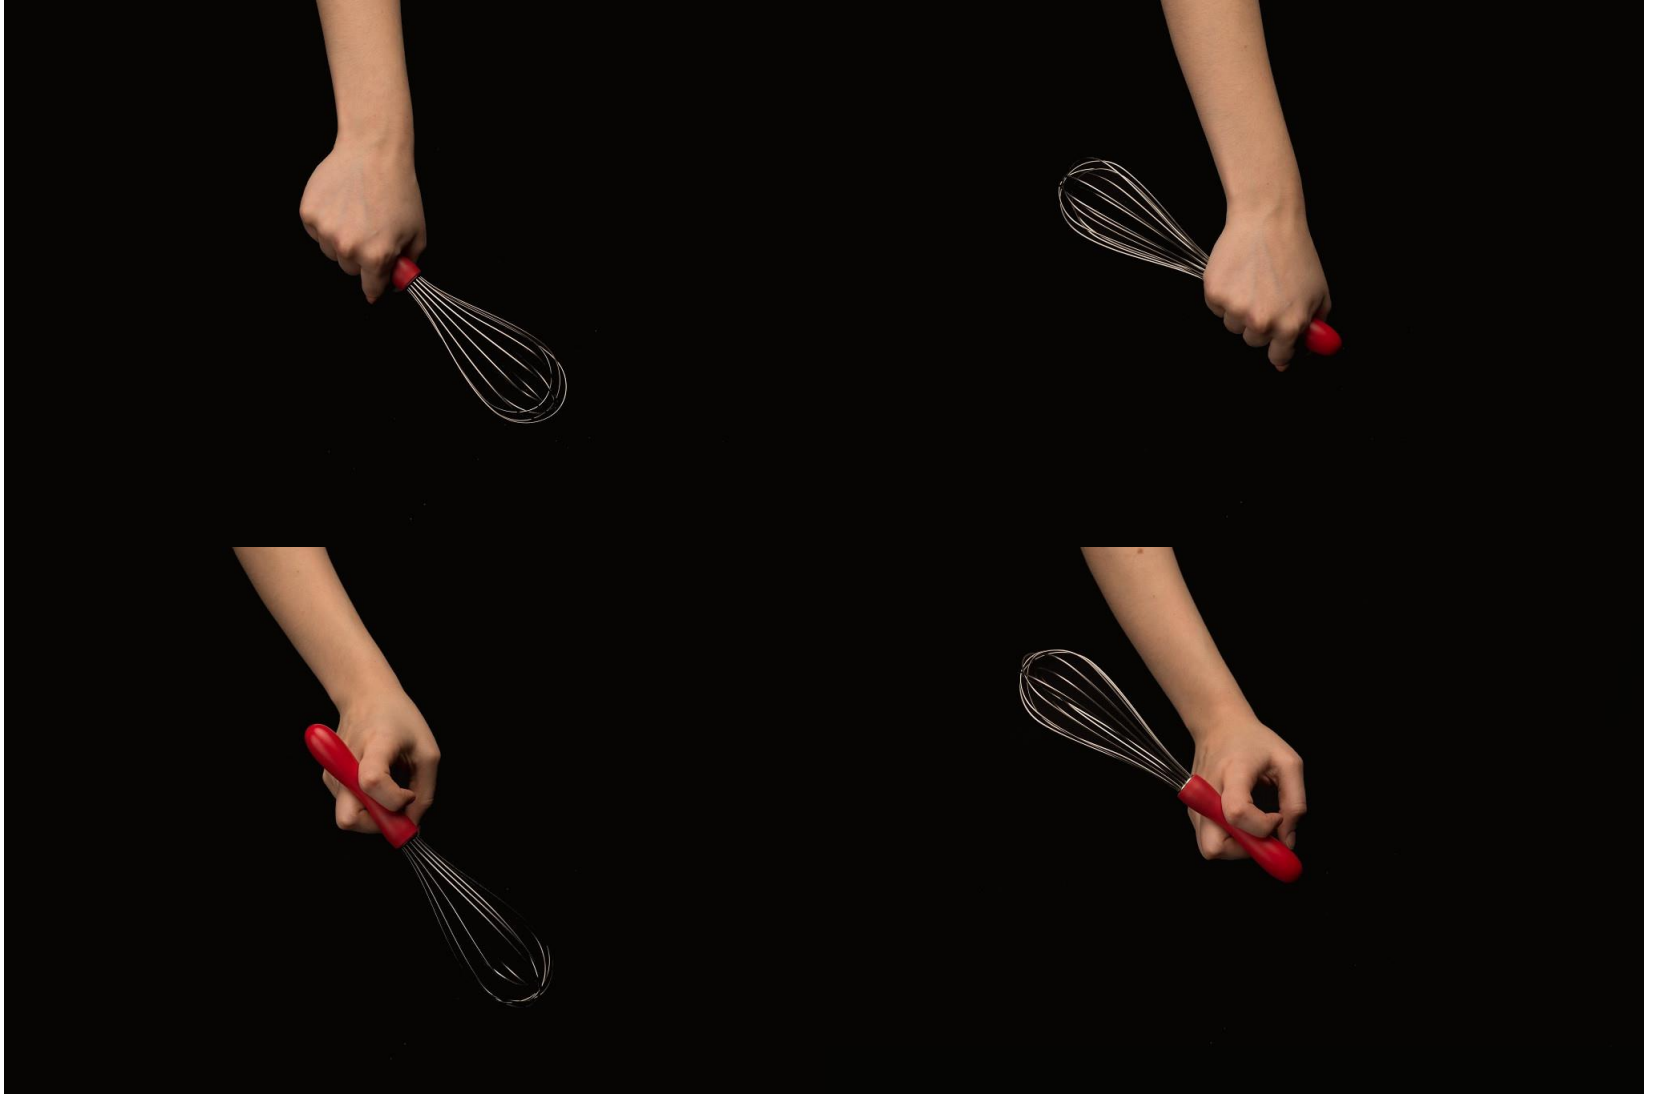

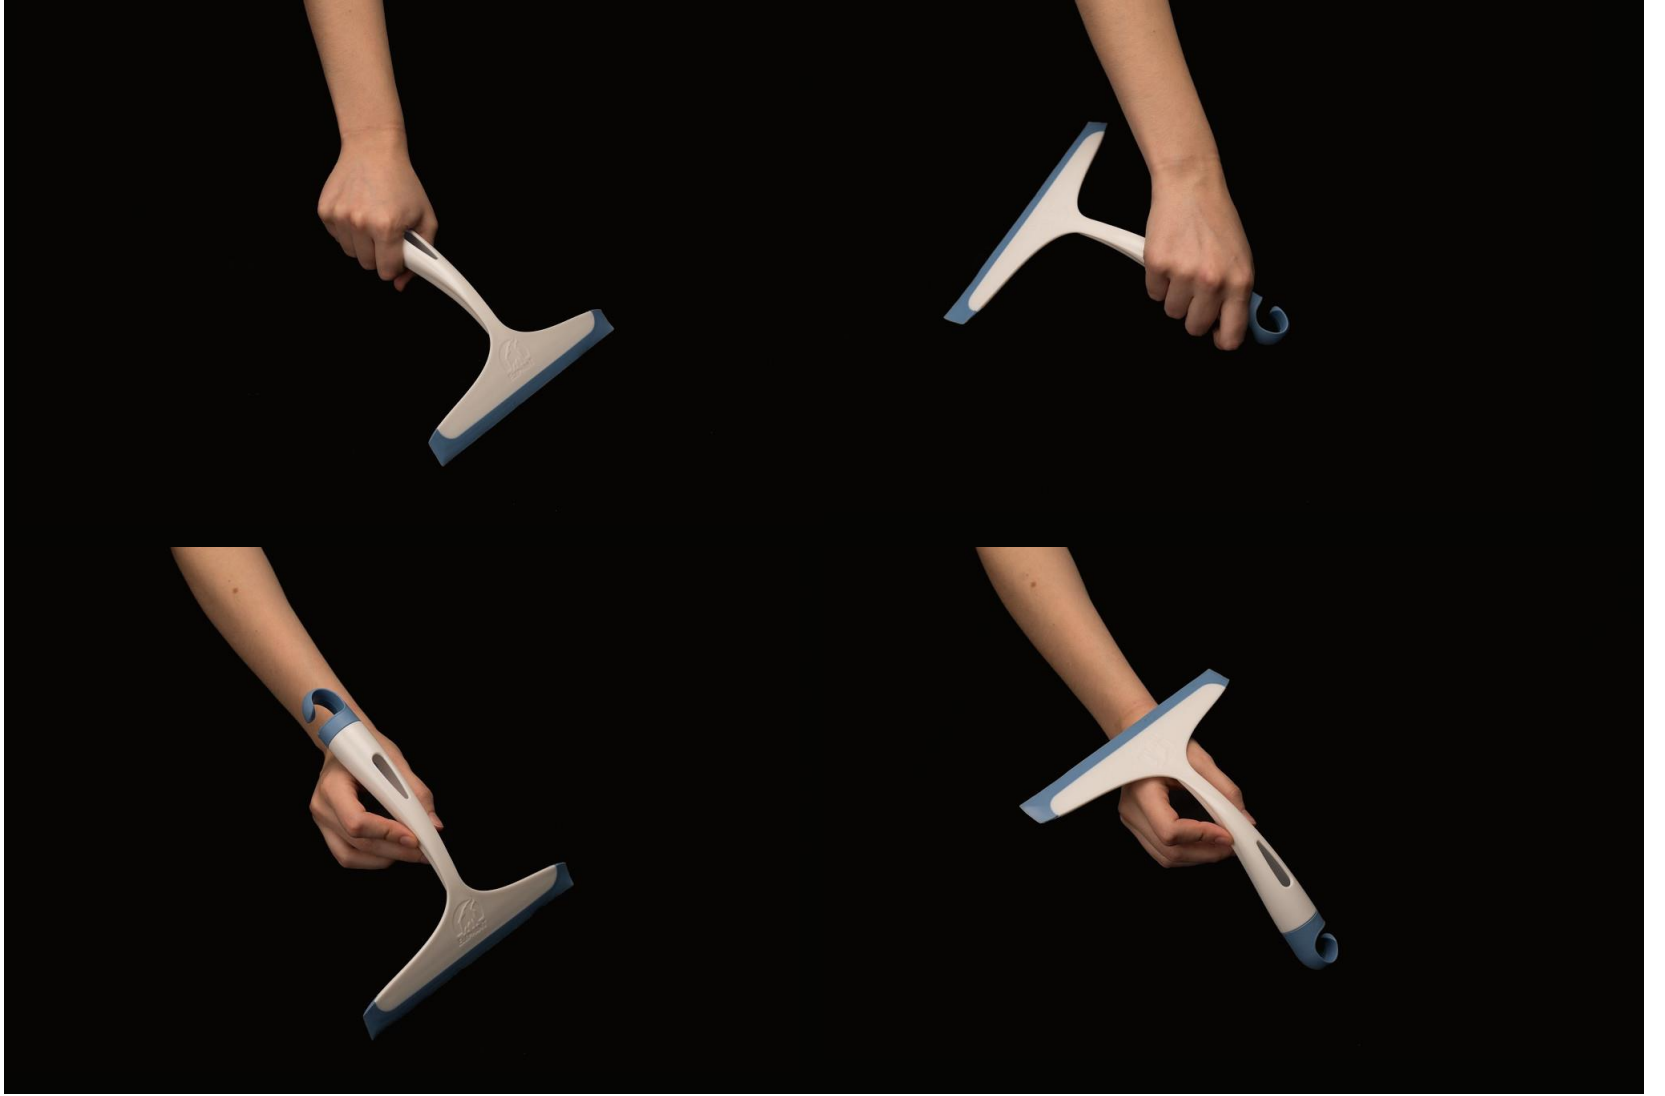

Supplement: 41598_2020_61963_MOESM1_ESM.pdf [file 41598_2020_61963_MOESM1_ESM.pdf]
